# Supplementary material
Source: PubMed Central journal article supplement (PMC4232850)
Supplement: NIHMS637161-supplement-Supporting_Information.pdf [file NIHMS637161-supplement-Supporting_Information.pdf]

# Table of Contents

|                                                                                                                                  |     |
|----------------------------------------------------------------------------------------------------------------------------------|-----|
| General Information.....                                                                                                         | S1  |
| Preparation of starting materials <b>6</b> , <b>7</b> , <b>9</b> , <b>13</b> - <b>14</b> and <b>20</b> .....                     | S2  |
| Synthesis of fragments <b>21</b> - <b>23</b> , <b>25</b> , <b>26</b> and <b>5</b> .....                                          | S4  |
| Biological evaluation.....                                                                                                       | S6  |
| Matching.....                                                                                                                    | S6  |
| NMR Spectra of Compounds <b>5</b> - <b>7</b> , <b>14</b> , <b>21</b> - <b>23</b> , <b>25</b> and <b>26</b> (Figures S1-S18)..... | S7  |
| UV/Vis Chromatograms of <b>26</b> and <b>5</b> (Figures S19 and S20).....                                                        | S16 |
| HPLC Chromatograms of <b>26</b> - <b>5</b> (Figures S21-S22).....                                                                | S17 |
| MS-MS spectra of endogenously produced <b>5</b> and synthetic <b>5</b> (Figure S23) .....                                        | S18 |
| References.....                                                                                                                  | S19 |

## General Information

Unless stated otherwise, all commercially available reagents and solvents were used in the form they were supplied without any further purification. The stated yields are based on isolated material. Thin layer chromatography was performed on silica gel 60 F<sub>254</sub> aluminum-backed plates fabricated by Merck. Flash column chromatography was performed on silica gel 60 (40-63  $\mu\text{m}$ ) produced by Merck. NMR spectra were recorded on a Bruker AVI600, Bruker AVI400 or a Bruker DPX300 spectrometer at 600 MHz, 400 MHz or 300 MHz respectively for <sup>1</sup>H NMR and at 125 MHz, 100 MHz or 75 MHz respectively for <sup>13</sup>C NMR. Coupling constants (*J*) are reported in hertz and chemical shifts are reported in parts per million ( $\delta$ ) relative to the central residual protium solvent resonance in <sup>1</sup>H NMR (CDCl<sub>3</sub> =  $\delta$  7.27, DMSO-*d*<sub>6</sub> =  $\delta$  2.50 and MeOH-*d*<sub>4</sub> =  $\delta$  3.31) and the central carbon solvent resonance in <sup>13</sup>C NMR (CDCl<sub>3</sub> =  $\delta$  77.00 ppm, DMSO-*d*<sub>6</sub> =  $\delta$  39.43 and MeOD-*d*<sub>4</sub> =  $\delta$  49.00). Mass spectra were recorded at 70 eV on Waters Prospec Q spectrometer using EI, ES or CI as the methods of ionization. High resolution mass spectra were recorded on Waters Prospec Q spectrometer using EI or ES as the methods of ionization. Optical rotations were measured using a 1 mL cell with a 1.0 dm path length on a Perkin Elmer 341 polarimeter. HPLC analyses were performed on an Agilent Technologies 1200 Series instrument with diode array detector set at 254 nm and equipped with a C<sub>18</sub> stationary phase (Eclipse XDB-C18 5 $\mu\text{m}$  4.6  $\times$  150 mm), applying the conditions stated. The UV/Vis spectra from 190-900 nm were recorded using a Biochrom Libra S32PC spectrometer using quartz cuvettes. Diastereomeric ratios reported in this paper have not been validated by calibration, please see reference Wernerova and Hudlicky for discussions and guidelines.<sup>1</sup>

**(R,4E,6E)-7-bromo-3-((tert-butyldimethylsilyloxy)-1-((S)-4-isopropyl-2-thioxothiazolidin-3-yl)hepta-4,6-dien-1-one (20).**

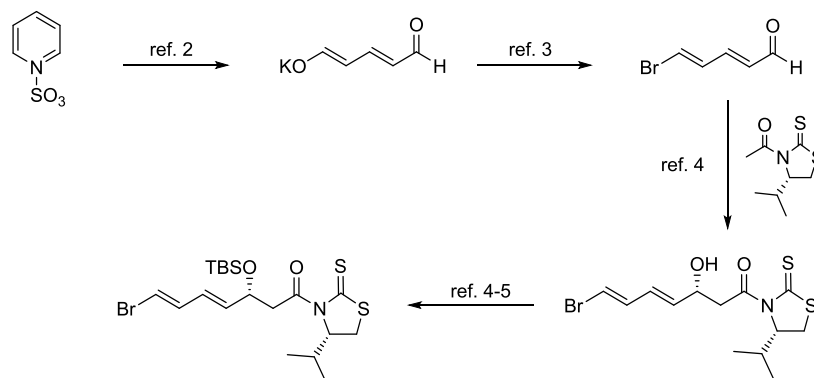

Vinylbromide **20** was prepared in 4 steps from commercially available pyridinium-1-sulfonate (**17**) in 34% overall yield (8.24 g), as previously reported.<sup>2-5</sup> All spectroscopic and physical data were in full agreement with those reported in the literature.<sup>6</sup>  $[\alpha]_D^{20} = 263$  ( $c = 0.5$ ,  $\text{CHCl}_3$ );  $^1\text{H NMR}$  (300 MHz,  $\text{CDCl}_3$ )  $\delta$  6.69 (dd,  $J = 13.4, 10.7$  Hz, 1H), 6.31 (d,  $J = 13.5$  Hz, 1H), 6.15 (dd,  $J = 15.5, 11.1$  Hz, 1H), 5.79 (dd,  $J = 14.9, 6.6$  Hz, 1H), 5.04 (t,  $J = 7.0$  Hz, 1H), 4.75 (q,  $J = 6.4$  Hz, 1H), 3.64 (dd,  $J = 16.6, 7.8$  Hz, 1H), 3.47 (dd,  $J = 10.9, 7.9$  Hz, 1H), 3.21 (dd,  $J = 16.4, 4.6$  Hz, 1H), 3.03 (d,  $J = 11.6$  Hz, 1H), 2.48 – 2.26 (m, 1H), 1.06 (d,  $J = 7.2$  Hz, 3H), 0.97 (d,  $J = 7.1$  Hz, 3H), 0.86 (s, 9H), 0.05 (s, 3H), 0.03 (s, 3H);  $^{13}\text{C NMR}$  (75 MHz,  $\text{CDCl}_3$ )  $\delta$  202.9, 170.9, 136.8, 127.4, 109.1, 71.8, 69.8, 46.2, 31.0, 30.9, 25.9 (3C), 19.3, 18.2, 17.9, -4.2, -4.8.

**(R,4E,6E)-7-bromo-3-((tert-butyldimethylsilyloxy)hepta-4,6-dien-1-ol (7).**

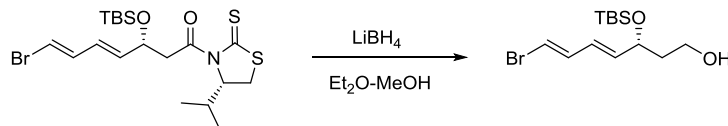

$\text{LiBH}_4$  (1.17 mL, 2 M in THF, 2.30 equiv.) was added to a solution of vinylbromide **20** (500 mg, 1.04 mmol, 1.00 equiv.) in  $\text{Et}_2\text{O}$  (8.8 ml) and MeOH (0.59 mL) at 0 °C. More  $\text{LiBH}_4$  (0.88 mL, 2M in THF, 1.70 equiv.) was added after 5 h and the solution was stirred for another 15 h. Excess  $\text{LiBH}_4$  was quenched with 0.5 M HCl. The phases were separated and the organic phase was washed with sat. aq.  $\text{NaHCO}_3$  (5 mL), water (5 mL) and brine (5 mL). The organic layer was dried ( $\text{Na}_2\text{SO}_4$ ), before being concentrated *in vacuo*. The crude product was purified by column chromatography on silica ( $\text{CH}_2\text{Cl}_2/\text{MeOH}$  99.5:0.5) to afford the title compound **7** as a yellow oil. Yield: 295 mg (88%); TLC ( $\text{CH}_2\text{Cl}_2/\text{MeOH}$  95:5, CAM stain):  $R_f = 0.67$ ;  $[\alpha]_D^{20} = 6.1$  ( $c = 0.1$ , MeOH);  $^1\text{H NMR}$  (400 MHz,  $\text{CDCl}_3$ )  $\delta$  6.70 (dd,  $J = 13.4, 10.9$  Hz, 1H), 6.30 (d,  $J = 13.5$  Hz, 1H), 6.12 (dd,  $J = 15.3, 10.8$  Hz, 1H), 5.74 (dd,  $J = 15.3, 6.0$  Hz, 1H), 4.43 (q,  $J = 5.8$  Hz, 1H), 3.85 – 3.74 (m, 1H), 3.73 – 3.66 (m, 1H), 2.05 (bs, 1H), 1.91 – 1.78 (m, 1H), 1.76 – 1.67 (m, 1H), 0.90 (s, 9H), 0.08 (s, 3H), 0.04 (s, 3H);  $^{13}\text{C NMR}$  (101 MHz,  $\text{CDCl}_3$ )  $\delta$  137.2, 136.9, 127.2, 108.9, 72.1, 60.1, 39.5, 25.0 (3C), 18.3, -4.3, -4.9. HRMS (TOF  $\text{ES}^+$ ): Exact mass calculated for  $\text{C}_{13}\text{H}_{25}\text{O}_2\text{Si}^{79}\text{BrNa}$  [ $M+\text{Na}$ ] $^+$ : 343.0704, found 343.0711.

**(Z)-hex-3-en-1-yltriphenylphosphonium iodide (9).**

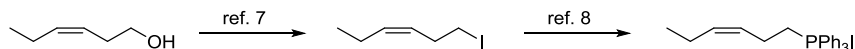

The Wittig salt **9** was prepared in 2 steps from commercially available (Z)-hex-3-en-1-ol (**16**) as previously reported,<sup>7-8</sup> in 90% overall yield (4.20 g). All spectroscopic and physical data were in agreement with those reported in the literature.<sup>8</sup>  $^1\text{H NMR}$  (400 MHz, DMSO)  $\delta$  7.96 – 7.71 (m, 15H), 5.49 – 5.31 (m, 2H), 3.66 (ddd,  $J = 16.1, 8.1, 5.2$  Hz, 2H), 2.29 (tt,  $J = 10.2, 5.9$  Hz, 2H), 1.85 (p,  $J = 7.4$  Hz, 2H), 0.85 (t,  $J = 7.5$  Hz, 3H);  $^{13}\text{C NMR}$  (101 MHz, DMSO)  $\delta$  134.9 (d,  $^4J_{\text{CP}} = 3.1$  Hz, 3C), 133.6 (d,  $^3J_{\text{CP}} = 10.2$  Hz, 6C), 133.5 (d,  $^4J_{\text{CP}} = 1.4$  Hz), 130.2 (d,  $^3J_{\text{CP}} = 12.4$  Hz, 6C), 125.9 (d,  $^3J_{\text{CP}} = 16.6$  Hz), 118.4 (d,  $^1J_{\text{CP}} = 85.7$  Hz, 3C), 20.4 (d,  $^1J_{\text{CP}} = 48.3$  Hz), 20.0, 19.7 (d,  $^2J_{\text{CP}} = 3.4$  Hz), 13.8.

**(S)-3-((*tert*-Butyldimethylsilyl)oxy)dihydrofuran-2(3H)-one (13).**

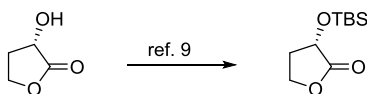

According to the procedure of Corey and coworkers,<sup>9</sup> the alcohol **10** was protected with a TBS-group. All spectroscopic and physical data were in full agreement with those reported in the literature.<sup>10</sup> Yield: 1.50 g (97%);  $[\alpha]_D^{20} = -31$  ( $c = 0.15$ ,  $\text{CDCl}_3$ );  $^1\text{H NMR}$  (400 MHz,  $\text{CDCl}_3$ )  $\delta$  4.42 – 4.32 (m, 2H), 4.21 – 4.12 (m, 1H), 2.49 – 2.39 (m, 1H), 2.27 – 2.12 (m, 1H), 0.89 (s, 9H), 0.15 (s, 3H), 0.12 (s, 3H).  $^{13}\text{C NMR}$  (101 MHz,  $\text{CDCl}_3$ )  $\delta$  176.0, 68.3, 64.8, 32.4, 25.7, 18.3, -4.6, -5.2.

**(S)-3-((*tert*-Butyldimethylsilyl)oxy)pent-4-yn-1-ol (14).**

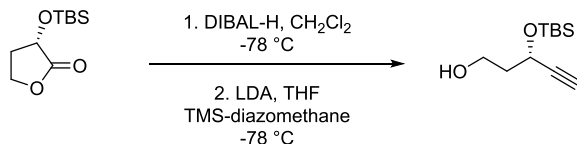

TBS-protected lactone **13** (1.50 g, 6.90 mmol, 1.0 equiv.) was dissolved in  $\text{CH}_2\text{Cl}_2$  (75 mL) and cooled to  $-78^\circ\text{C}$ . DIBAL-H (8.3 mL, 1 M in  $\text{CH}_2\text{Cl}_2$ , 8.3 mmol, 1.20 equiv.) was added dropwise and the solution was stirred until deemed complete by TLC (hexanes/EtOAc 6:4) (~2 h). The reaction was stirred for another 30 min before sat. aq. Rochelle-salt (30 mL) was added. The reaction was allowed to reach rt. The phases were separated and the aq. phase was extracted with  $\text{CH}_2\text{Cl}_2$  (3 x 35 mL) and the combined organic layers were dried ( $\text{MgSO}_4$ ), before it was concentrated *in vacuo*. The crude lactol was azeotroped twice with 2-Me-THF before being dissolved in THF (18 mL).

LDA (16.6 mL, 1 M in THF/hexanes) was diluted with THF (20 mL) and cooled to  $-78^\circ\text{C}$ . TMS-diazomethane (4.14 mL, 2 M in  $\text{Et}_2\text{O}$ ) was added and the reaction was stirred for 30 min. The crude lactol was added as quickly as possible without warming the reaction too much and stirred for another 2 h. The cooling bath was removed and the reaction was slowly allowed to reach rt and then stirred 30 min. The solution was quenched with sat.  $\text{NH}_4\text{Cl}$  (20 mL) (slowly at the beginning!). The phases were separated and the aq. phase was extracted with  $\text{Et}_2\text{O}$  (3 x 20 mL) and the combined organic layers were dried ( $\text{MgSO}_4$ ), before being concentrated *in vacuo*. The crude product was purified by column chromatography on silica (hexanes/EtOAc 8:2) to afford the title compound **14** as a colourless oil. Yield: 0.63 g (57%); Spectroscopic and physical data were in agreement with those reported in the literature.<sup>11</sup> TLC (hexanes/EtOAc 8:2,  $\text{KMnO}_4$  stain):  $R_f = 0.21$ ;  $[\alpha]_D^{20} = -55$  ( $c = 0.11$ ,  $\text{CHCl}_3$ );  $^1\text{H NMR}$  (400 MHz,  $\text{CDCl}_3$ )  $\delta$  4.61 (ddd,  $J = 7.0, 5.1, 2.1$  Hz, 1H), 3.89 (ddd,  $J = 11.8, 7.6, 4.2$  Hz, 1H), 3.75 (ddd,  $J = 10.9, 6.1, 4.5$  Hz, 1H), 2.47 (bs, 1H), 2.42 (d,  $J = 2.1$  Hz, 1H), 2.02 – 1.82 (m, 2H), 0.88 (s, 9H), 0.14 (s, 3H), 0.12 (s, 3H);  $^{13}\text{C NMR}$  (101 MHz,  $\text{CDCl}_3$ )  $\delta$  84.8, 73.2, 61.8, 59.8, 40.2, 25.8 (3C), 18.2, -4.5, -5.1.

**(S)-3-((*tert*-Butyldimethylsilyl)oxy)pent-4-ynal (15).**

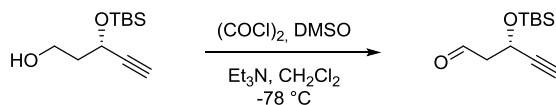

Oxalyl chloride (0.83 mL, 9.68 mmol, 1.10 equiv.) in  $\text{CH}_2\text{Cl}_2$  (21.0 mL) was added dropwise to a solution of DMSO (1.42 mL, 20.00 mmol, 2.30 equiv.) in  $\text{CH}_2\text{Cl}_2$  (10.6 mL) at  $-78^\circ\text{C}$ . After 15 min, the alcohol **14** (1.87 g, 8.73 mmol, 1.00 equiv.) in  $\text{CH}_2\text{Cl}_2$  (10.6 mL) was added and the stirring was continued for 20 min at  $-78^\circ\text{C}$  before the temperature was raised to  $-40^\circ\text{C}$ . After 45 min, the temperature was lowered to  $-78^\circ\text{C}$  again, and  $\text{Et}_3\text{N}$  (6.13 mL) was added. The reaction was allowed to reach rt before it was diluted with water (15 mL), extracted with  $\text{CH}_2\text{Cl}_2$  (3 x 20 mL). The combined organic layers were dried ( $\text{Na}_2\text{SO}_4$ ), before being concentrated *in vacuo*. The crude product was purified by column chromatography on silica (hexanes/EtOAc 95:5) to afford the title compound **15** as a yellow oil. Yield: 1.57 g (85%); Spectroscopic and physical data were in full agreement with those reported in the literature.<sup>12</sup> TLC (hexanes/EtOAc 95:5,  $\text{KMnO}_4$  stain):  $R_f = 0.17$ ;  $[\alpha]_D^{20} = -58$  ( $c = 0.20$ ,  $\text{CHCl}_3$ );  $^1\text{H NMR}$  (300 MHz,  $\text{CDCl}_3$ )  $\delta$  9.82 (t,  $J = 2.1$  Hz, 1H), 4.86 (ddd,  $J = 6.9, 5.0, 2.2$  Hz, 1H), 2.80 (ddd,  $J = 16.4, 6.8, 2.2$  Hz, 1H), 2.69 (ddd,  $J = 16.4, 5.0, 2.0$  Hz, 1H), 2.49 (d,  $J = 2.2$  Hz, 1H), 0.88 (s, 9H), 0.16 (s, 3H), 0.13 (s, 3H);  $^{13}\text{C NMR}$  (101 MHz,  $\text{CDCl}_3$ )  $\delta$  200.1, 83.9, 73.9, 58.2, 51.5, 25.8 (3C), 18.2, -4.5, -5.1.

**tert-Butyldimethyl(((S,5Z,8Z)-undeca-5,8-dien-1-yn-3-yl)oxy)silane (6).**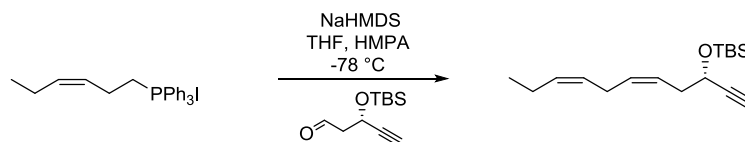

To the Wittig salt **9** (2.80 g, 5.93 mmol, 1.05 equiv.) in THF (53 mL) was added HMPA (8 mL) before NaHMDS (9.9 mL, 0.6 M in toluene, 1.05 equiv.) was slowly added at -78 °C, and then stirred for 5 min at 0 °C. Aldehyde **15** (1.20 g, 5.65 mmol, 1.00 equiv.) was added at -78 °C. The solution was allowed to slowly warm up to room temperature in the dry ice/acetone bath over 20 h before it was quenched with phosphate buffer (20 mL, pH = 7.2). Et<sub>2</sub>O (25 mL) was added and the phases were separated. The aqueous phase was extracted with Et<sub>2</sub>O (2 x 25 mL) and the combined organic layers were dried (Na<sub>2</sub>SO<sub>4</sub>), before being concentrated *in vacuo*. The crude product was purified by column chromatography on silica (hexanes/EtOAc 95:5) to afford the title compound **6** as a yellow oil. Less than 5% of the undesired *E*-isomer was obtained as determined by GLC. Yield: 1.30 g (83%); TLC (hexanes/EtOAc 95:5, KMnO<sub>4</sub> stain): *R*<sub>f</sub> = 0.64; [α]<sub>D</sub><sup>20</sup> = -22 (c = 0.07, CHCl<sub>3</sub>); <sup>1</sup>H NMR (400 MHz, CDCl<sub>3</sub>) δ 5.56 – 5.43 (m, 2H), 5.42 – 5.26 (m, 2H), 4.40 – 4.31 (m, 1H), 2.81 (t, *J* = 6.5 Hz, 2H), 2.47 (t, *J* = 6.3 Hz, 2H), 2.39 (d, *J* = 1.3 Hz, 1H), 2.07 (p, *J* = 7.4 Hz, 2H), 0.97 (t, *J* = 7.5 Hz, 3H), 0.91 (s, 9H), 0.14 (s, 3H), 0.11 (s, 3H); <sup>13</sup>C NMR (101 MHz, CDCl<sub>3</sub>) δ 132.2, 131.1, 127.2, 124.7, 85.5, 72.3, 62.9, 36.8, 26.0, 25.9 (3C), 20.7, 18.4, 14.4, -4.5, -4.9. HRMS (TOF ES<sup>+</sup>): Exact mass calculated for C<sub>17</sub>H<sub>30</sub>O<sub>1</sub>SiNa [*M*+Na]<sup>+</sup>: 301.1963, found 301.1967.

**(3R,4E,6E,10S,12Z,15Z)-3,10-bis((tert-Butyldimethylsilyl)oxy)octadeca-4,6,12,15-tetraen-8-yn-1-ol (21).**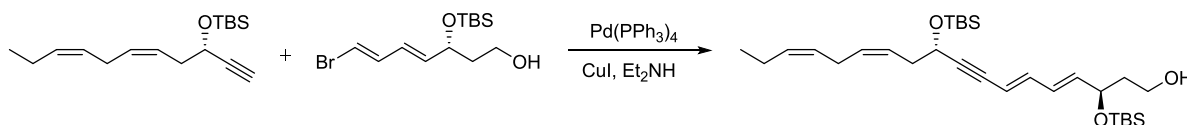

To a solution of vinyl bromide **7** (241 mg, 0.75 mmol, 1.00 equiv.) in Et<sub>2</sub>NH (3.3 mL) and benzene (0.6 mL), Pd(PPh<sub>3</sub>)<sub>4</sub> (26 mg, 0.02 mmol, 3 mol%) was added and the reaction was stirred for 45 min in the dark. CuI (7 mg, 0.04 mmol, 5 mol%) in a minimum amount of Et<sub>2</sub>NH was added followed by dropwise addition of alkyne **6** (208 mg, 0.75 mmol, 1.00 equiv.) in Et<sub>2</sub>NH (1.5 mL). After 20 h of stirring at ambient temperature, the reaction was quenched by addition of saturated NH<sub>4</sub>Cl (20 mL). Et<sub>2</sub>O (15 mL) was added and the phases were separated. The aqueous phase was extracted with Et<sub>2</sub>O (2 x 20 mL) and the combined organic layers were dried (Na<sub>2</sub>SO<sub>4</sub>), before being concentrated *in vacuo*. The crude product was purified by column chromatography on silica (hexanes/EtOAc 8:2) to afford the title compound **21** as a yellow oil. Yield: 276 mg (71%); TLC (hexanes/EtOAc 8:2, KMnO<sub>4</sub> stain): *R*<sub>f</sub> = 0.32; [α]<sub>D</sub><sup>20</sup> = +12 (c = 0.10, CHCl<sub>3</sub>); <sup>1</sup>H NMR (300 MHz, CDCl<sub>3</sub>) δ 6.55 (dd, *J* = 15.5, 10.8 Hz, 1H), 6.24 (dd, *J* = 15.2, 10.9 Hz, 1H), 5.80 (dd, *J* = 15.2, 6.1 Hz, 1H), 5.62 (dd, *J* = 15.5, 1.2 Hz, 1H), 5.55 – 5.46 (m, 2H), 5.46 – 5.28 (m, 2H), 4.55 – 4.44 (m, 2H), 3.89 – 3.75 (m, 1H), 3.79 – 3.67 (m, 1H), 2.83 (t, *J* = 5.9 Hz, 2H), 2.49 (t, *J* = 6.2 Hz, 2H), 2.09 (p, *J* = 7.0 Hz, 2H), 1.92 – 1.81 (m, 1H), 1.80 – 1.68 (m, 1H), 0.93 (s, 3H), 0.92 (s, 18H), 0.16 (s, 3H), 0.14 (s, 3H), 0.11 (s, 3H), 0.06 (s, 3H). <sup>13</sup>C NMR (101 MHz, CDCl<sub>3</sub>) δ 140.8, 138.4, 132.2, 131.0, 129.2, 127.2, 124.9, 111.2, 93.7, 83.5, 72.4, 63.6, 60.2, 39.6, 36.9, 26.0 (7C), 20.7, 18.4, 18.3, 14.4, -4.2, -4.3, -4.8, -4.8. HRMS (TOF ES<sup>+</sup>): Exact mass calculated for C<sub>30</sub>H<sub>54</sub>O<sub>3</sub>Si<sub>2</sub>Na [*M*+Na]<sup>+</sup>: 541.3509, found 541.3516.

**(5R,6E,8E,12S)-5-(2-Bromoethyl)-2,2,3,3,14,14,15,15-octamethyl-12-((2Z,5Z)-octa-2,5-dien-1-yl)-4,13-dioxo-3,14-disilaheptadeca-6,8-dien-10-yne (22).**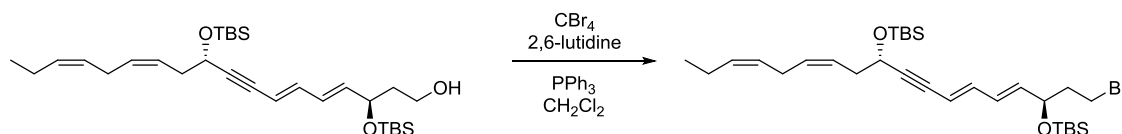

Alcohol **21** (140 mg, 0.27 mmol, 1.00 equiv.) and CBr<sub>4</sub> (134 mg, 0.40 mmol, 1.5 equiv.) was dissolved in CH<sub>2</sub>Cl<sub>2</sub> (8 mL) and the reaction was cooled to -10 °C. 2,6-Lutidine (0.3 mL, 0.27 mmol, 1.00 equiv.) was added. Next, PPh<sub>3</sub> (106 mg, 0.40 mmol, 1.50 equiv.) was dissolved in CH<sub>2</sub>Cl<sub>2</sub> (1.5 mL) and this solution was added dropwise to the reaction mixture over 15 min. The solution was stirred for another 4 h before it was washed through a plug of silica. Further purification by column chromatography on silica (first pure hexane to get rid of any remaining CBr<sub>4</sub>, then hexanes/EtOAc 95:5) afforded the title

compound **22** as a yellow oil. Yield: 152 mg (97%); TLC (hexanes/EtOAc 9:1, KMnO<sub>4</sub> stain):  $R_f = 0.80$ ;  $[\alpha]_D^{20} = -19$  ( $c = 0.10$ , CHCl<sub>3</sub>); <sup>1</sup>H NMR (300 MHz, CDCl<sub>3</sub>)  $\delta$  6.51 (dd,  $J = 15.5, 10.8$  Hz, 1H), 6.21 (dd,  $J = 15.2, 11.0$  Hz, 1H), 5.71 (dd,  $J = 15.2, 6.5$  Hz, 1H), 5.61 (dd,  $J = 15.7, 1.5$  Hz, 1H), 5.54 – 5.42 (m, 2H), 5.41 – 5.25 (m, 2H), 4.49 (td,  $J = 6.5, 1.8$  Hz, 1H), 4.40 – 4.30 (m, 2H), 3.52 – 3.35 (m, 2H), 2.81 (t,  $J = 6.0$  Hz, 2H), 2.47 (t,  $J = 6.1$  Hz, 2H), 2.12 – 1.89 (m, 3H), 0.97 (t,  $J = 7.5$  Hz, 3H), 0.91 (s, 7H), 0.89 (s, 8H), 0.14 (s, 3H), 0.11 (s, 2H), 0.08 (s, 3H), 0.03 (s, 3H); <sup>13</sup>C NMR (101 MHz, CDCl<sub>3</sub>)  $\delta$  140.8, 138.1, 132.2, 131.0, 129.5, 127.2, 124.9, 111.4, 93.7, 83.4, 71.0, 63.6, 41.1, 36.9, 30.0, 26.0 (3C), 26.0 (3C), 26.0, 20.7, 18.4, 18.3, 14.4, -4.1, -4.3, -4.7, -4.8. HRMS (TOF ES<sup>+</sup>): Exact mass calculated for C<sub>30</sub>H<sub>54</sub>O<sub>3</sub>Si<sub>2</sub>Na [ $M+Na$ ]<sup>+</sup>: 541.3509, found 541.3516.

**Ethyl (7R,8E,10E,14S,16Z,19Z)-7,14-bis((tert-butylidimethylsilyl)oxy)docosa-8,10,16,19-tetraen-12-ynoate (23).**

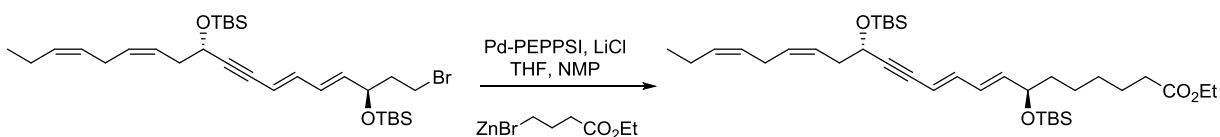

A solution of LiCl (1.75 mL, 0.5 M in THF, 0.88 mmol) and NMP (0.6 mL) was added to Pd-PEPPSI<sup>TM</sup>-IPr (**24**) (14.8 mg, 0.02 mmol, 8 mol%) and stirred for 10 min. 4-Ethoxy-4-oxobutylzinc bromide (**8**) (0.88 mL, 0.5 M in THF, 0.44 mmol, 1.6 equiv.) was added, followed by alkyl bromide **22** (159 mg, 0.27 mmol, 1.0 equiv.) in NMP (0.71 mL), and the solution was stirred for another 2 h at rt. The mixture was diluted with Et<sub>2</sub>O (15 mL) and washed successively with 1 M Na<sub>3</sub>EDTA (15 mL) and brine (10 mL). The organic layer was dried (Na<sub>2</sub>SO<sub>4</sub>), before it was concentrated *in vacuo*. The crude product was purified by column chromatography on silica (hexanes/EtOAc 95:5) to afford the title compound **23** as a yellow oil. Yield: 115 mg (68%); TLC (hexanes/EtOAc 9:1, CAM stain):  $R_f = 0.36$ ;  $[\alpha]_D^{20} = +10$  ( $c = 0.13$ , CHCl<sub>3</sub>); <sup>1</sup>H NMR (300 MHz, CDCl<sub>3</sub>)  $\delta$  6.51 (dd,  $J = 15.5, 10.8$  Hz, 1H), 6.15 (dd,  $J = 15.4, 11.0$  Hz, 1H), 5.73 (dd,  $J = 15.2, 6.2$  Hz, 1H), 5.57 (dd,  $J = 15.7, 1.5$  Hz, 1H), 5.51 – 5.44 (m, 2H), 5.44 – 5.25 (m, 2H), 4.48 (td,  $J = 6.6, 1.8$  Hz, 1H), 4.19 – 4.05 (m, 3H), 2.86 – 2.76 (m, 2H), 2.50 – 2.43 (m, 2H), 2.28 (t,  $J = 7.5$  Hz, 2H), 2.07 (p,  $J = 7.1$  Hz, 2H), 1.67 – 1.57 (m, 2H), 1.53 – 1.40 (m, 2H), 1.36 – 1.28 (m, 4H), 1.25 (t,  $J = 7.1$  Hz, 3H), 0.97 (t,  $J = 7.5$  Hz, 3H), 0.91 (s, 9H), 0.88 (s, 6H), 0.13 (s, 3H), 0.11 (s, 3H), 0.03 (s, 3H), 0.01 (s, 3H); <sup>13</sup>C NMR (101 MHz, CDCl<sub>3</sub>)  $\delta$  173.9, 141.3, 139.9, 132.2, 130.9, 128.5, 127.3, 125.0, 110.5, 93.3, 83.6, 72.9, 63.6, 60.3, 38.2, 36.9, 34.5, 29.3, 26.0 (3C), 26.0 (3C), 25.1, 24.9, 20.7, 18.4, 18.4, 14.4, -4.2, -4.3, -4.6, -4.8. HRMS (TOF ES<sup>+</sup>): Exact mass calculated for C<sub>36</sub>H<sub>64</sub>O<sub>4</sub>Si<sub>2</sub>Na [ $M+Na$ ]<sup>+</sup>: 639.4240, found 639.4237.

**Ethyl (7R,8E,10E,14S,16Z,19Z)-7,14-dihydroxydocosa-8,10,16,19-tetraen-12-ynoate (25).**

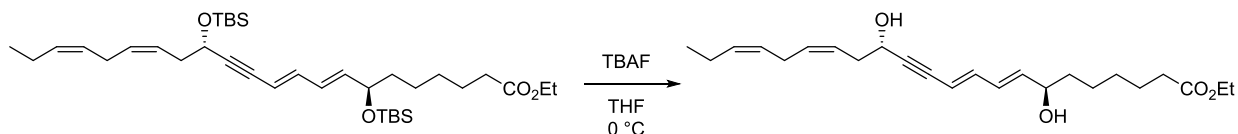

TBAF (0.93 mL 1.0 M in THF, 0.93 mmol, 5.0 equiv.) was added to a solution of TBS-protected alcohol **23** (115 mg, 0.19 mmol, 1.0 equiv.) in THF (5.0 mL) at 0 °C. The reaction was stirred for 20 h before it was quenched with phosphate buffer (pH = 7.2, 3.0 mL). Brine (5 mL) and CH<sub>2</sub>Cl<sub>2</sub> (10 mL) were added and the phases were separated. The aq. phase was extracted with CH<sub>2</sub>Cl<sub>2</sub> (2 x 10 mL) and the combined organic layer was dried (Na<sub>2</sub>SO<sub>4</sub>) before being concentrated *in vacuo*. The crude product was purified by column chromatography on silica (hexanes/EtOAc 1:1) to afford the title compound **25** as a pale yellow oil. Yield: 70 mg (97%); TLC (hexanes/EtOAc 1:1, KMnO<sub>4</sub> stain):  $R_f = 0.30$ ;  $[\alpha]_D^{20} = -39$  ( $c = 0.14$ , CHCl<sub>3</sub>); <sup>1</sup>H NMR (300 MHz, CDCl<sub>3</sub>)  $\delta$  6.56 (dd,  $J = 15.5, 10.8$  Hz, 1H), 6.24 (dd,  $J = 15.4, 10.8$  Hz, 1H), 5.78 (dd,  $J = 15.2, 6.4$  Hz, 1H), 5.65 – 5.25 (m, 5H), 4.61 – 4.46 (m, 1H), 4.23 – 4.05 (m, 3H), 2.83 (t,  $J = 7.0$  Hz, 2H), 2.53 (t,  $J = 6.5$  Hz, 2H), 2.28 (t,  $J = 7.5$  Hz, 2H), 2.07 (p,  $J = 7.4$  Hz, 2H), 2.00 (s, 1H), 1.98 (s, 1H), 1.69 – 1.47 (m, 4H), 1.46 – 1.28 (m, 4H), 1.25 (t,  $J = 7.1$  Hz, 3H), 0.97 (t,  $J = 7.5$  Hz, 3H); <sup>13</sup>C NMR (101 MHz, CDCl<sub>3</sub>)  $\delta$  173.8, 141.4, 138.9, 132.4, 132.3, 129.2, 126.7, 123.6, 110.7, 92.3, 84.0, 72.2, 62.5, 60.2, 37.0, 35.7, 34.2, 29.0, 25.8, 25.0, 24.8, 20.6, 14.2, 14.2. HRMS (TOF ES<sup>+</sup>): Exact mass calculated for C<sub>24</sub>H<sub>36</sub>O<sub>4</sub>Na [ $M+Na$ ]<sup>+</sup>: 411.2511, found 411.2520.

### Ethyl (7R,8E,10E,12Z,14S,16Z,19Z)-7,14-dihydroxydocosa-8,10,12,16,19-pentaenoate (**26**).

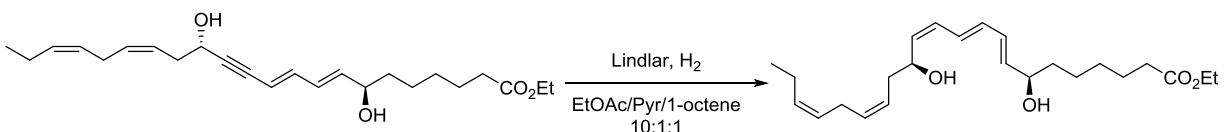

To a solution of alkyne **25** (30 mg, 0.077 mmol) in EtOAc/pyridine/1-octene (0.90 mL, 10:1:1) under argon, Lindlar's catalyst (35 mg) was added and the flask was evacuated and filled with argon. The reaction was stirred for 5.5 h at ambient temperature under a balloon of hydrogen gas until completion. The reaction mixture was loaded directly onto a silica gel column and purified by chromatography (toluene/Et<sub>2</sub>O/EtOAc 60:35:5) to afford the title compound **26** as a pale oil. Yield: 23 mg (77%); HPLC analysis (Eclipse XDB-C18, MeOH/H<sub>2</sub>O 78:22, 1.3 mL/min, *t<sub>r</sub>* = 9.56 min. TLC (Hexane/EtOAc/CH<sub>2</sub>Cl<sub>2</sub>/MeOH 57.5:30:10:2.5, CAM stain): *R<sub>f</sub>* = 0.24; [ $\alpha$ ]<sub>D</sub><sup>20</sup> = -34 (*c* = 0.05, MeOH); UV (MeOH)  $\lambda_{\max}$  262, 272, 282 nm. <sup>1</sup>H NMR (400 MHz, MeOD)  $\delta$  6.58 – 6.46 (m, 1H), 6.34 – 6.19 (m, 2H), 6.08 (t, *J* = 11.1 Hz, 1H), 5.72 (dd, *J* = 14.0, 6.7 Hz, 1H), 5.51 – 5.26 (m, 5H), 4.63 – 4.53 (m, 1H), 4.14 – 4.05 (m, 3H), 2.80 (t, *J* = 6.5 Hz, 2H), 2.44 – 2.33 (m, 1H), 2.30 (t, *J* = 7.4 Hz, 2H), 2.27 – 2.19 (m, 1H), 2.08 (p, *J* = 7.4 Hz, 2H), 1.66 – 1.28 (m, 8H), 1.24 (t, *J* = 7.1 Hz, 3H), 0.97 (t, *J* = 7.5 Hz, 3H); <sup>13</sup>C NMR (101 MHz, MeOD)  $\delta$  175.5, 138.6, 135.0, 134.8, 132.8, 131.3, 131.3, 130.6, 128.8, 128.2, 126.1, 73.1, 68.5, 61.4, 38.2, 36.5, 35.0, 30.1, 26.6, 26.2, 26.0, 21.5, 14.7, 14.6. HRMS (TOF ES<sup>+</sup>): Exact mass calculated for C<sub>24</sub>H<sub>38</sub>O<sub>4</sub>Na [M+Na]<sup>+</sup>: 413.2667, found 413.2677.

### MaR1<sub>n-3</sub> DPA (**5**).

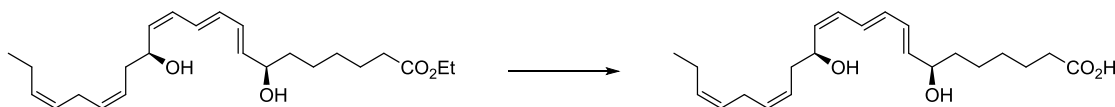

To a solution of ethyl ester **26** (10 mg, 0.03 mmol, 1.0 equiv.) in THF/MeOH/H<sub>2</sub>O (2/2/1, 3.5 mL), solid LiOH (21.5 mg, 0.90 mmol, 35 equiv.) was added at 0 °C. The mixture was stirred at 0 °C for 3 h and then allowed to warm up to room temperature. The solution was acidified with aq. sat. NaH<sub>2</sub>PO<sub>4</sub> (4 mL) and then EtOAc (4 mL) was added. The layers were separated and the water phase was extracted with EtOAc (2 x 4 mL). The combined organic layer was dried (Na<sub>2</sub>SO<sub>4</sub>) before being concentrated *in vacuo*. The crude product was purified by column chromatography on silica (CH<sub>2</sub>Cl<sub>2</sub>/MeOH 95:5) to afford the title compound **5** as a colorless oil. The chemical purity (>98%) was determined by HPLC analysis (Eclipse XDB-C18, MeOH/10.0 mM HCO<sub>2</sub>H/H<sub>2</sub>O 70:10:20, 1.0 mL/min): *t<sub>r</sub>* = 9.28 min. Yield: 8 mg (86%); TLC (CH<sub>2</sub>Cl<sub>2</sub>/MeOH 95:5, CAM stain): *R<sub>f</sub>* = 0.11; [ $\alpha$ ]<sub>D</sub><sup>20</sup> = -87 (*c* = 0.14 MeOH); UV (MeOH)  $\lambda_{\max}$  261, 270, 281 nm. IR (neat)  $\nu$  = cm<sup>-1</sup>. <sup>1</sup>H NMR (400 MHz, MeOD)  $\delta$  6.60 – 6.42 (m, 1H), 6.32 – 6.21 (m, 2H), 6.08 (t, *J* = 10.9 Hz, 1H), 5.73 (dd, *J* = 13.9, 6.7 Hz, 1H), 5.48 – 5.26 (m, 5H), 4.63 – 4.49 (m, 1H), 4.08 (q, *J* = 6.5 Hz, 1H), 2.80 (t, *J* = 6.5 Hz, 2H), 2.44 – 2.35 (m, 1H), 2.31 – 2.18 (m, 3H), 2.08 (p, *J* = 7.3 Hz, 2H), 1.66 – 1.32 (m, 8H), 0.97 (t, *J* = 7.5 Hz, 3H); <sup>13</sup>C NMR (101 MHz, MeOD)  $\delta$  178.1, 138.6, 135.1, 134.7, 132.8, 131.3, 131.2, 130.6, 128.7, 128.2, 126.1, 73.1, 68.5, 38.2, 36.5, 35.3, 30.2, 26.6, 26.3, 26.2, 21.5, 14.7. HRMS (TOF ES<sup>+</sup>): Exact mass calculated for C<sub>22</sub>H<sub>34</sub>O<sub>4</sub>Na [M+Na]<sup>+</sup>: 385.2354, found 385.2363.

### Human macrophage efferocytosis *in vitro*

Human apoptotic PMN were obtained by density-gradient Ficoll-Histopaque from human peripheral blood. Blood was obtained from healthy human volunteers giving informed consent (protocol #199-P-001297 approved by the Partners Human Research Committee). PMN were labeled with Bisbenzimidazole H 33342 (Sigma-Aldrich), a fluorescent nuclear dye (10  $\mu$ g/mL, 30 min, 37 °C) and cultured overnight (5 x 10<sup>6</sup> cells/mL in PBS<sup>+/+</sup>). Human macrophages were seeded in 96 well plates (5 x 10<sup>4</sup> cells/well) and incubated with vehicle (PBS containing 0.1% ethanol) or indicated concentrations (10<sup>-12</sup> to 10<sup>-8</sup> M) of MaR1 (**4**), MaR1<sub>n-3</sub> DPA (**5**) or MaR1<sub>n-3</sub> DPA ethyl ester (**25**) (PBS<sup>+/+</sup>, 37 °C, 15 min). Fluorescently labeled apoptotic PMN (1.5 x 10<sup>5</sup> cells/well) were added and cells incubated for additional 45 min at 37 °C. Non-phagocytosed apoptotic PMN were then washed, extracellular fluorescence quenched and phagocytosis quantified. Results are percent increase over vehicle and expressed as mean  $\pm$  s.e.m. *n* = 4 with 3 – 4 determinations for each. \**P* < 0.05, \*\**P* < 0.01, \*\*\**P* < 0.001 and \*\*\*\**P* < 0.0001 vs. vehicle; ##*P* < 0.05, ###*P* < 0.01, ####*P* < 0.001 vs. MaR1 (**4**). Extracellular fluorescence was quenched and phagocytosis assessed using SpectraMax M3 plate reader (Molecular Devices).

### Matching

Human macrophage MaR1<sub>n-3</sub> DPA (**5**) matches synthetic material **5**. Representative MRM chromatograms of selected ion chromatograms (*m/z* 361-223) depicting (A) MaR1<sub>n-3</sub> DPA (**5**) obtained from human macrophages (5 x 10<sup>7</sup>/mL) incubated with 0.1 mg opsonized zymosan A and n-3 DPA (1  $\mu$ M, 37 °C, 30 min, DPBS<sup>+/+</sup>, pH = 7.45). *n* = 3 human macrophage preparations. (B) Synthetic material (inset: characteristic UV-absorption spectrum, spectrometer cutoff ~1 nm). (C) Co-injection of human macrophage MaR1<sub>n-3</sub> DPA (**5**) with synthetic material **5**. *n* = 3

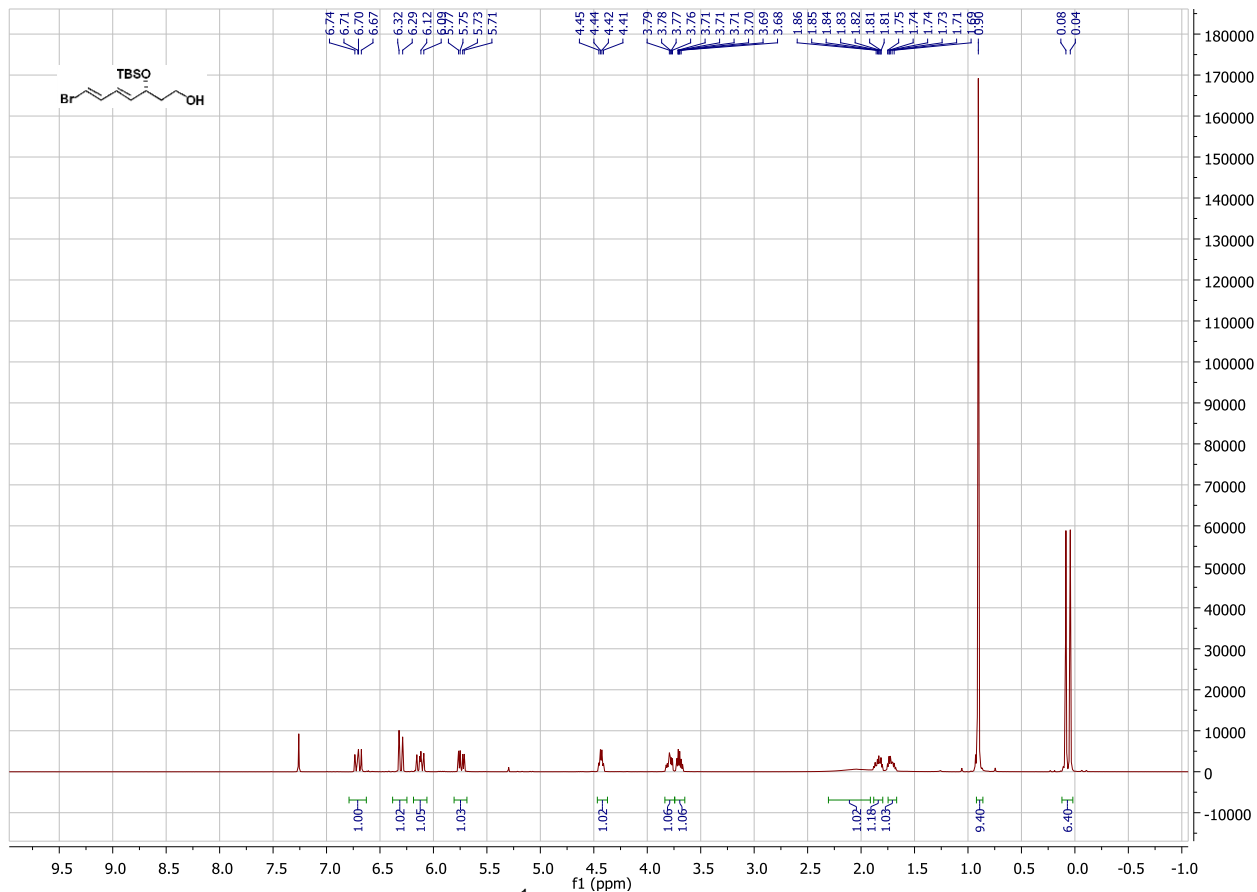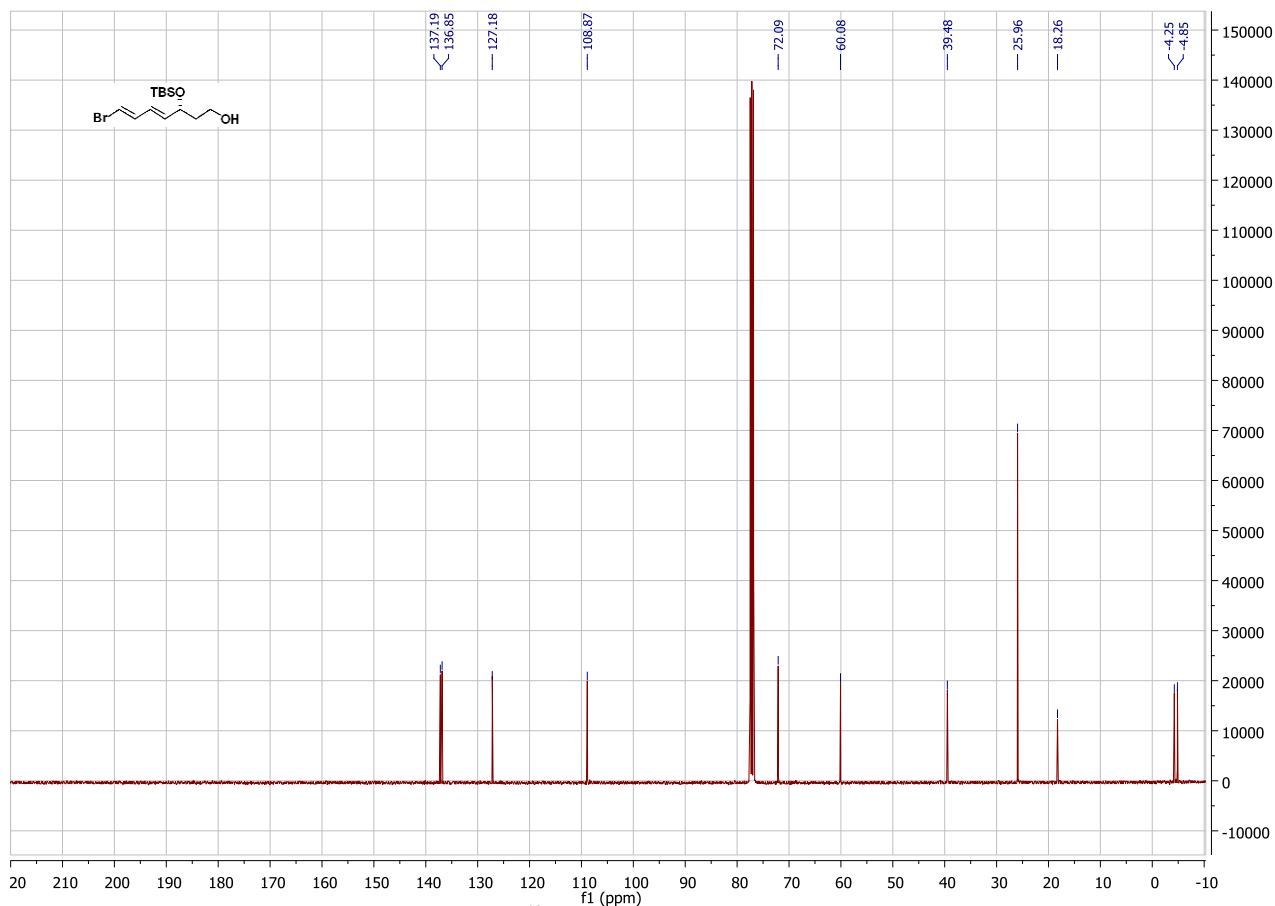

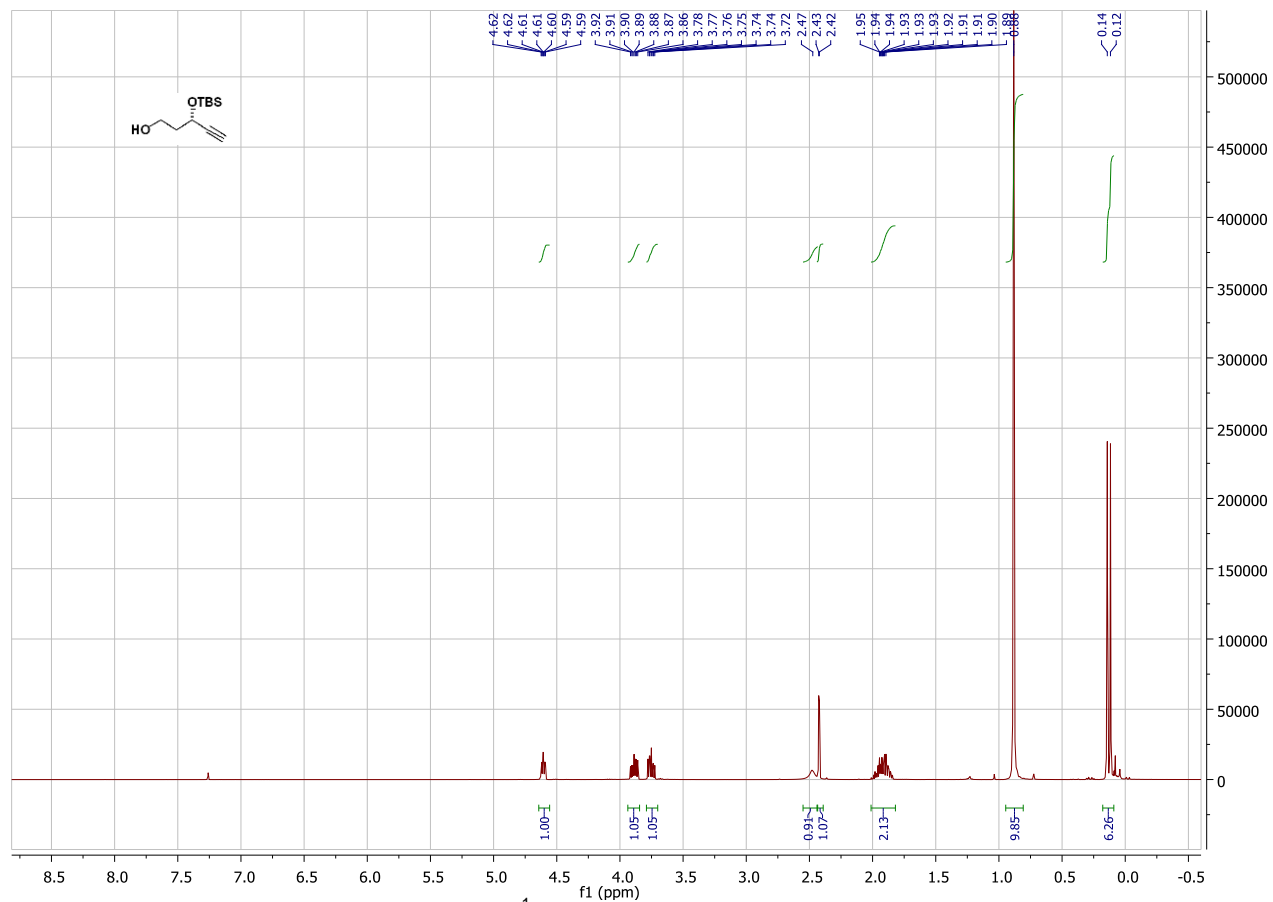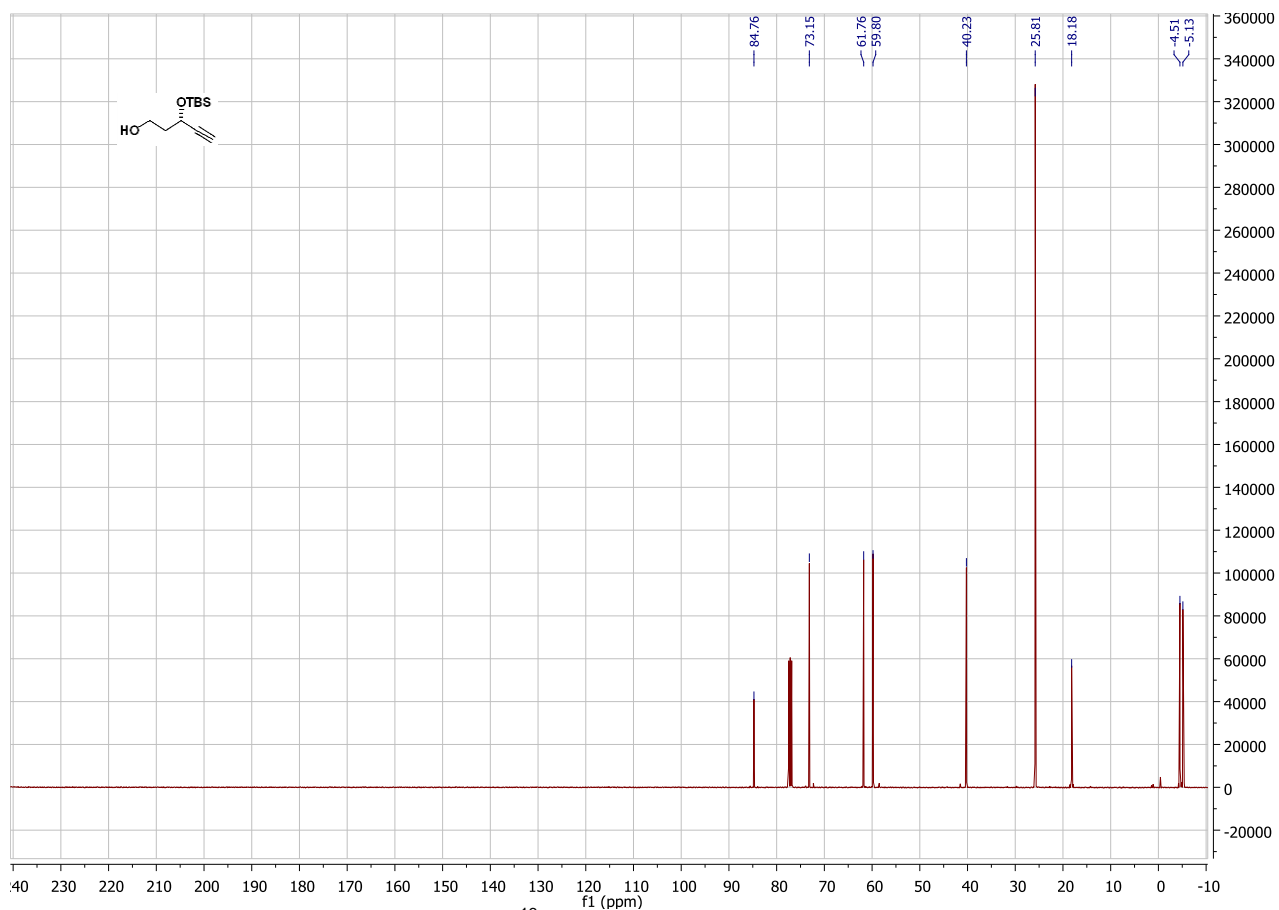



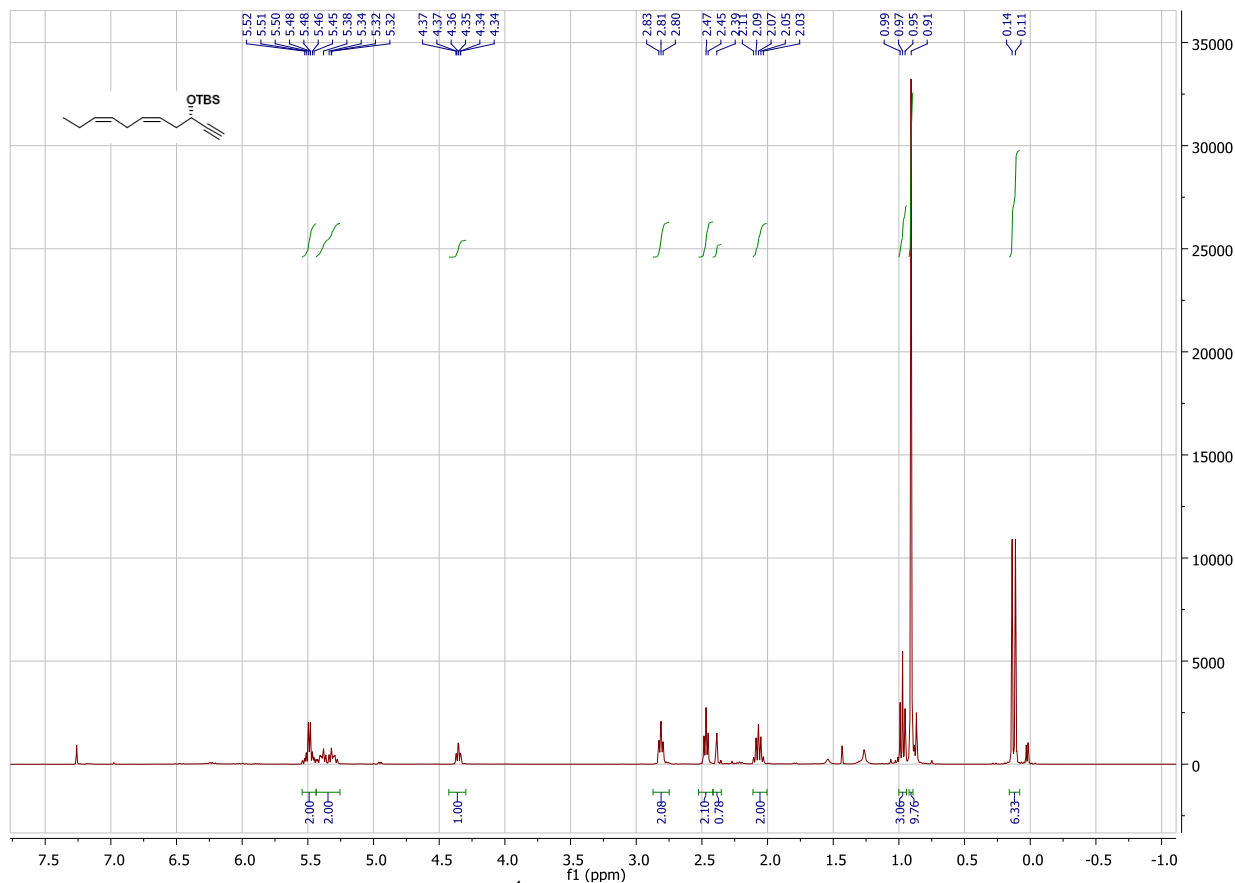

Figure S-5 <sup>1</sup>H-NMR spectrum of compound 6.

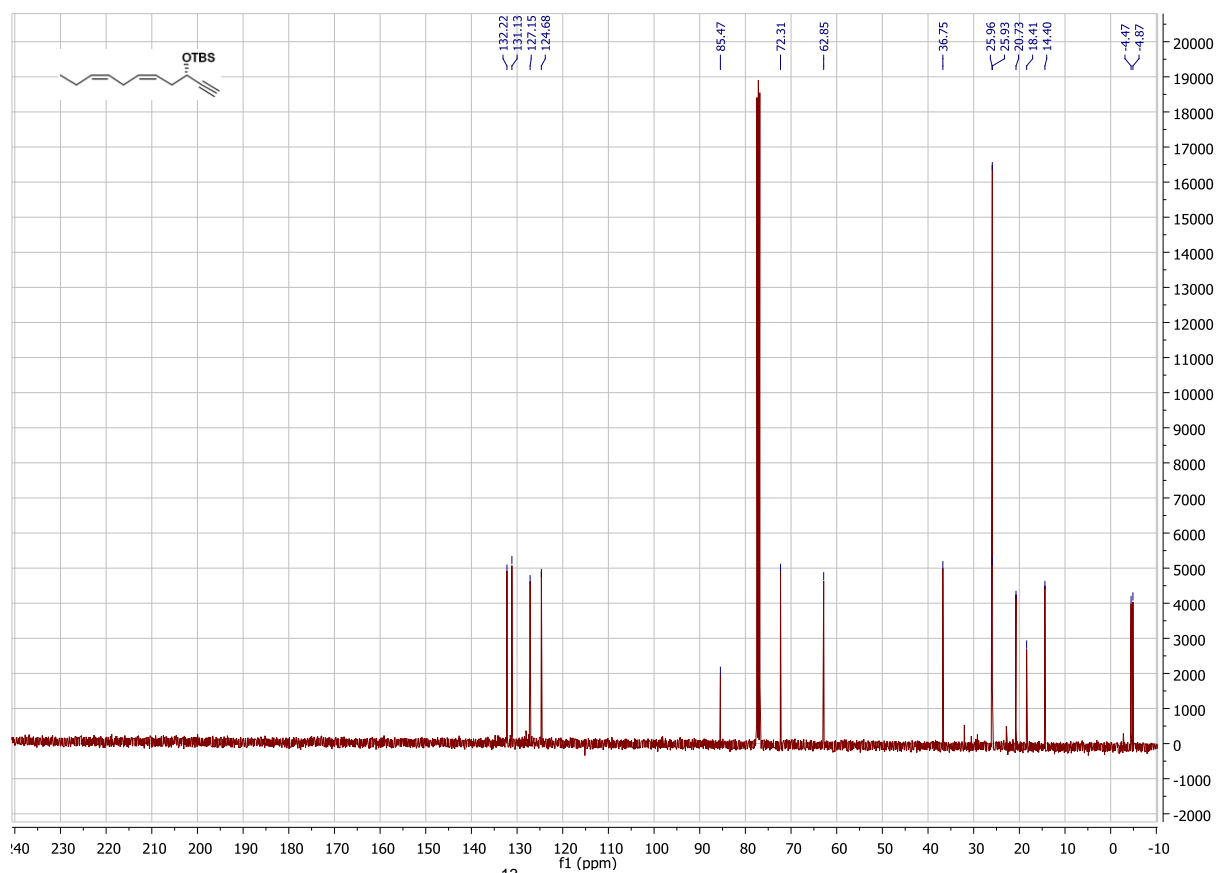

Figure S-6 <sup>13</sup>C-NMR spectrum of compound 6.

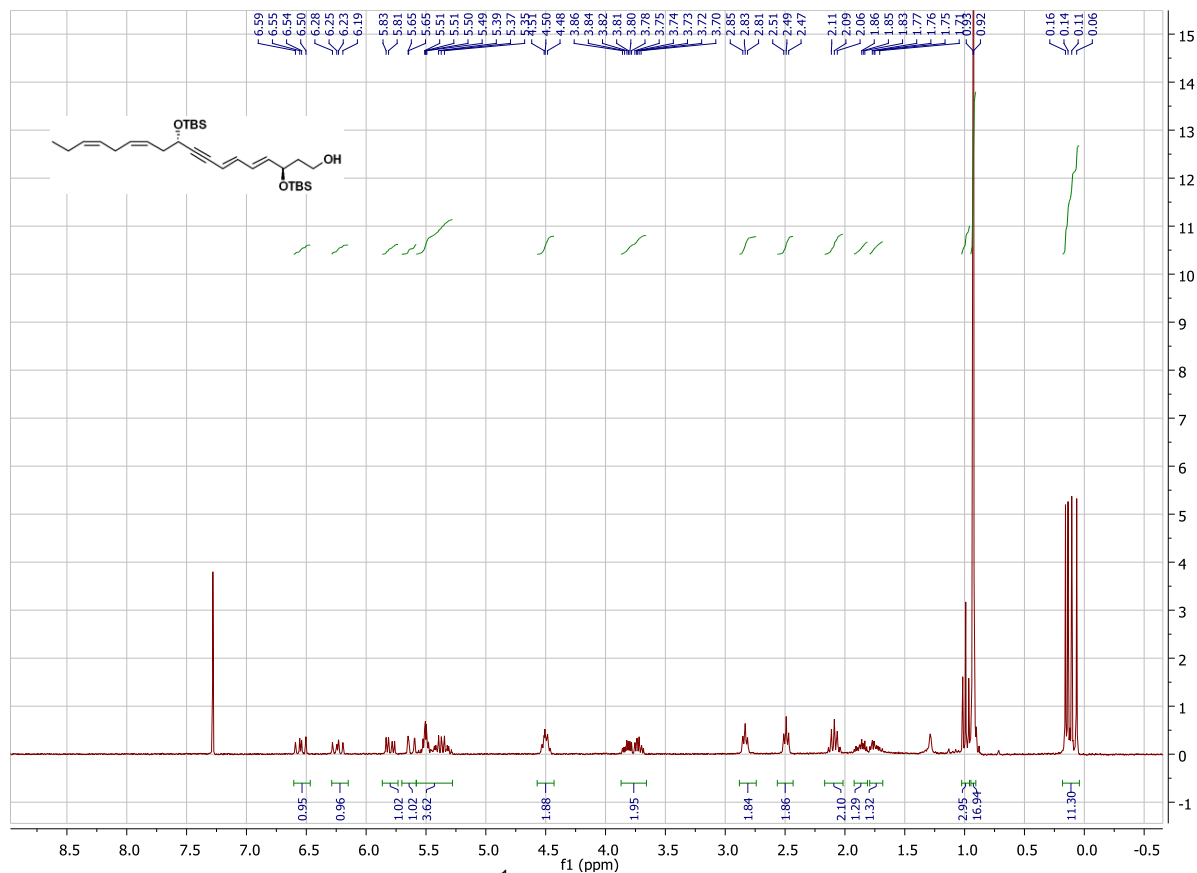

Figure S-7  $^1\text{H-NMR}$  spectrum of compound 21.

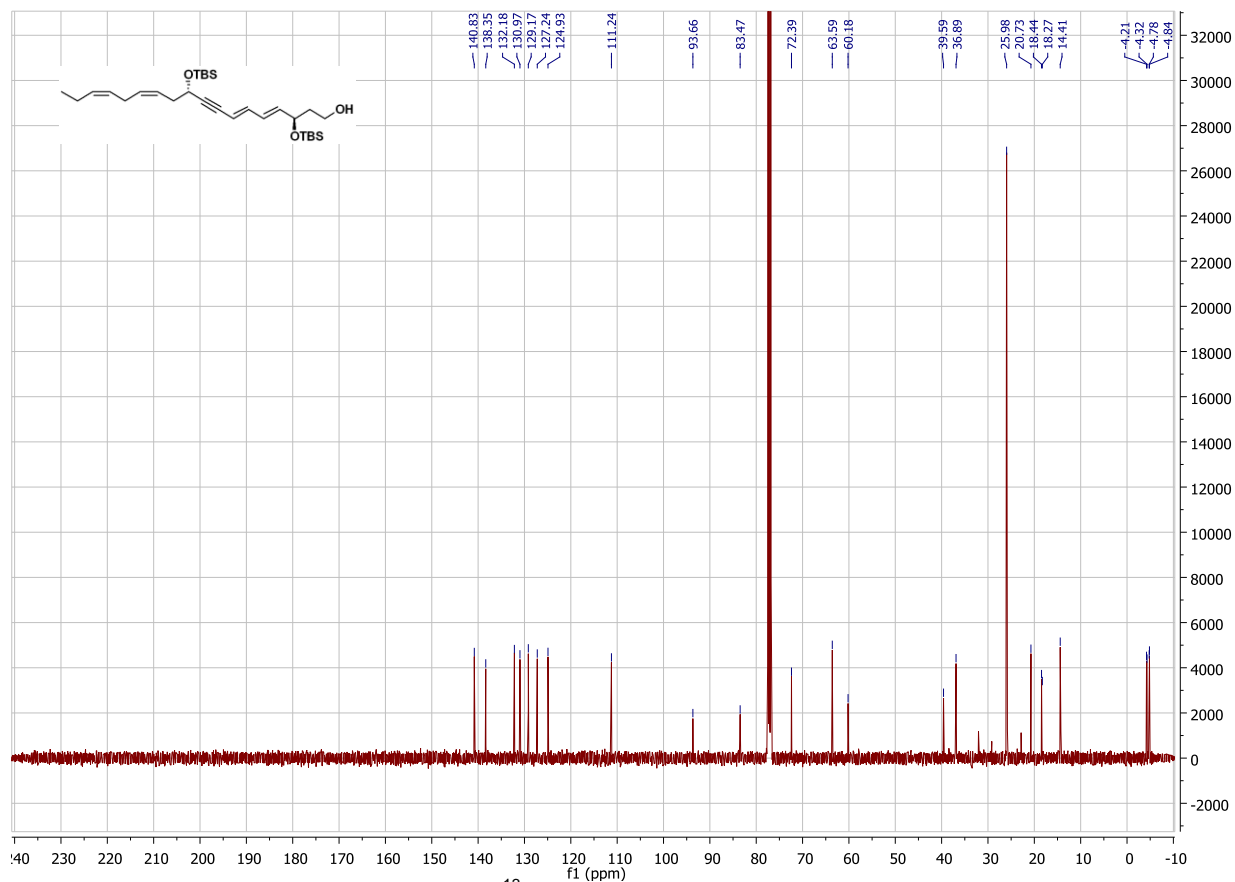

Figure S-8  $^{13}\text{C-NMR}$  spectrum of compound 21.



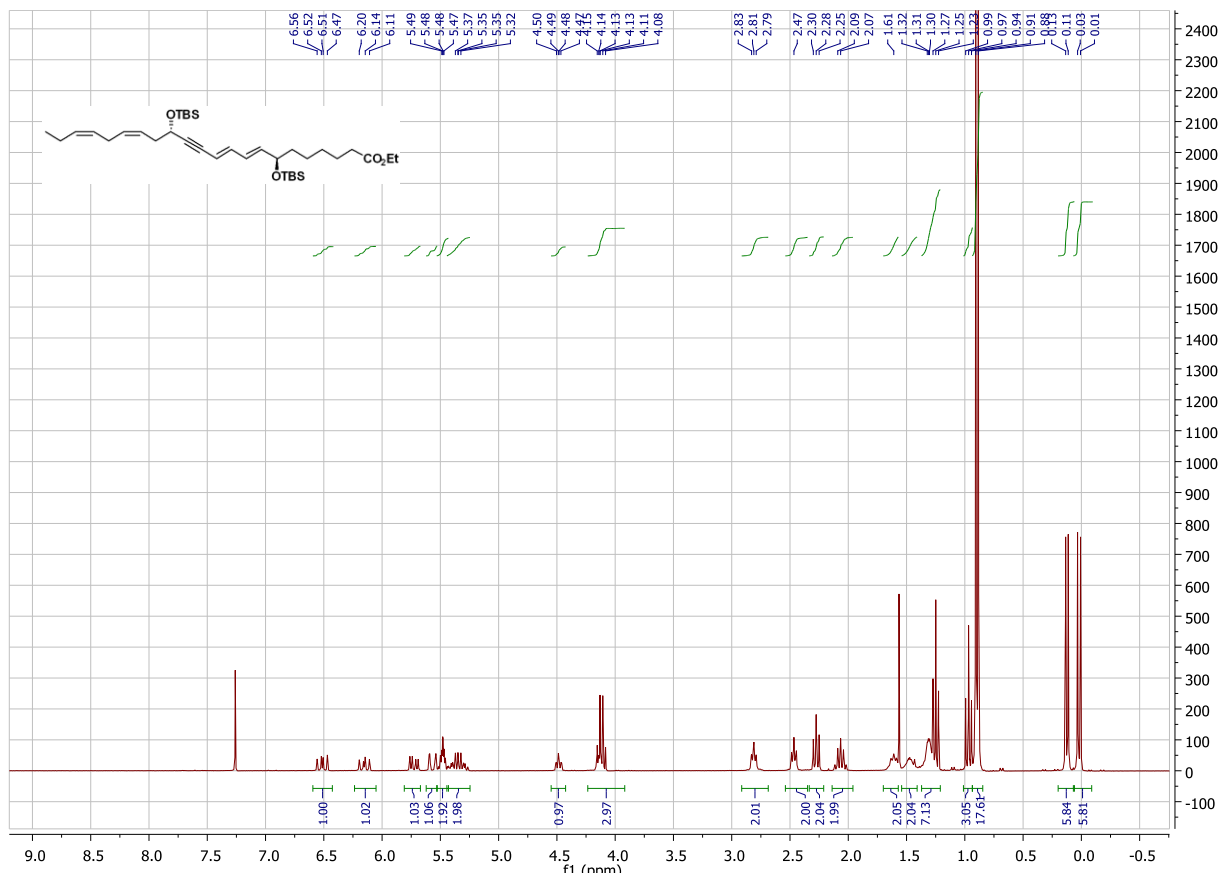

Figure S-11 <sup>1</sup>H-NMR spectrum of compound 23.

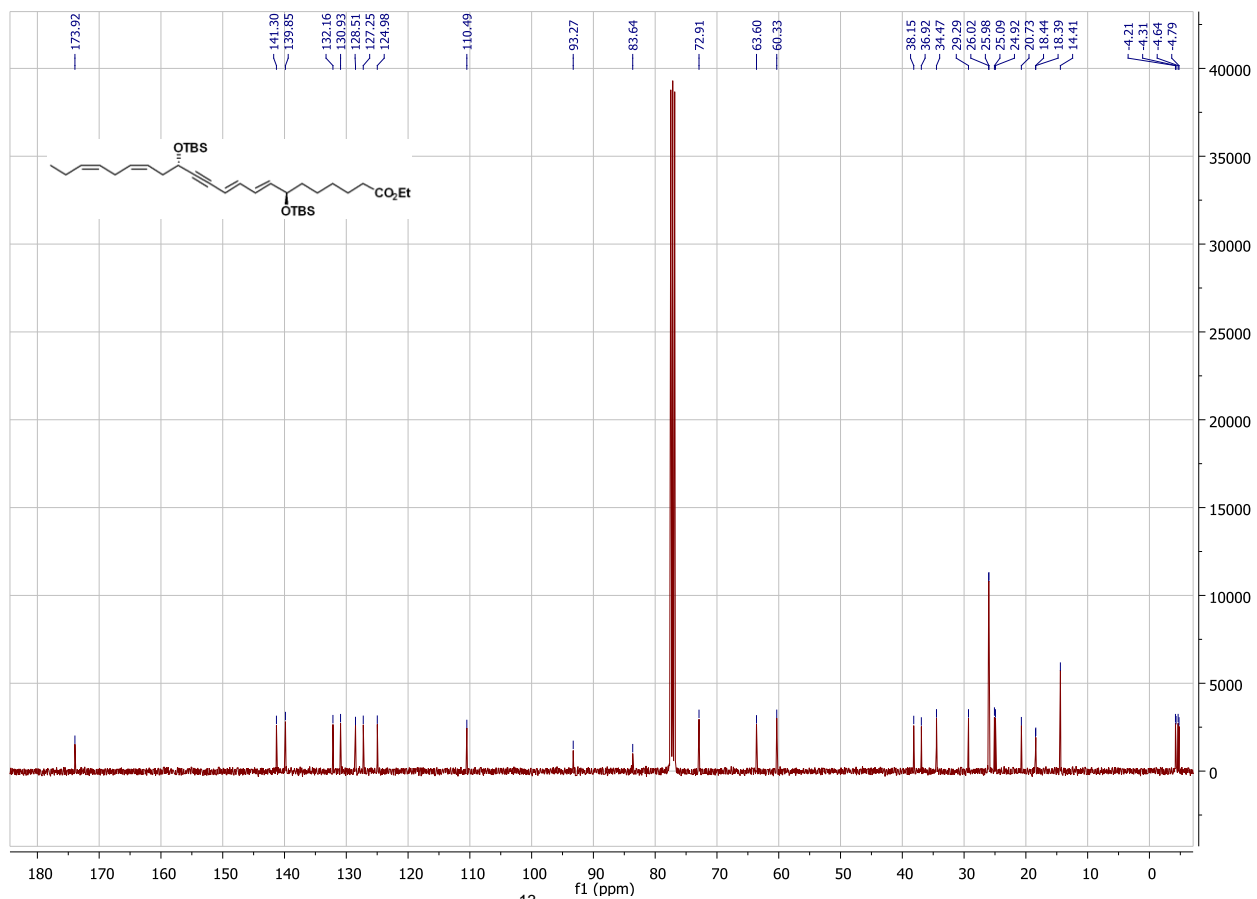

Figure S-12 <sup>13</sup>C-NMR spectrum of compound 23.

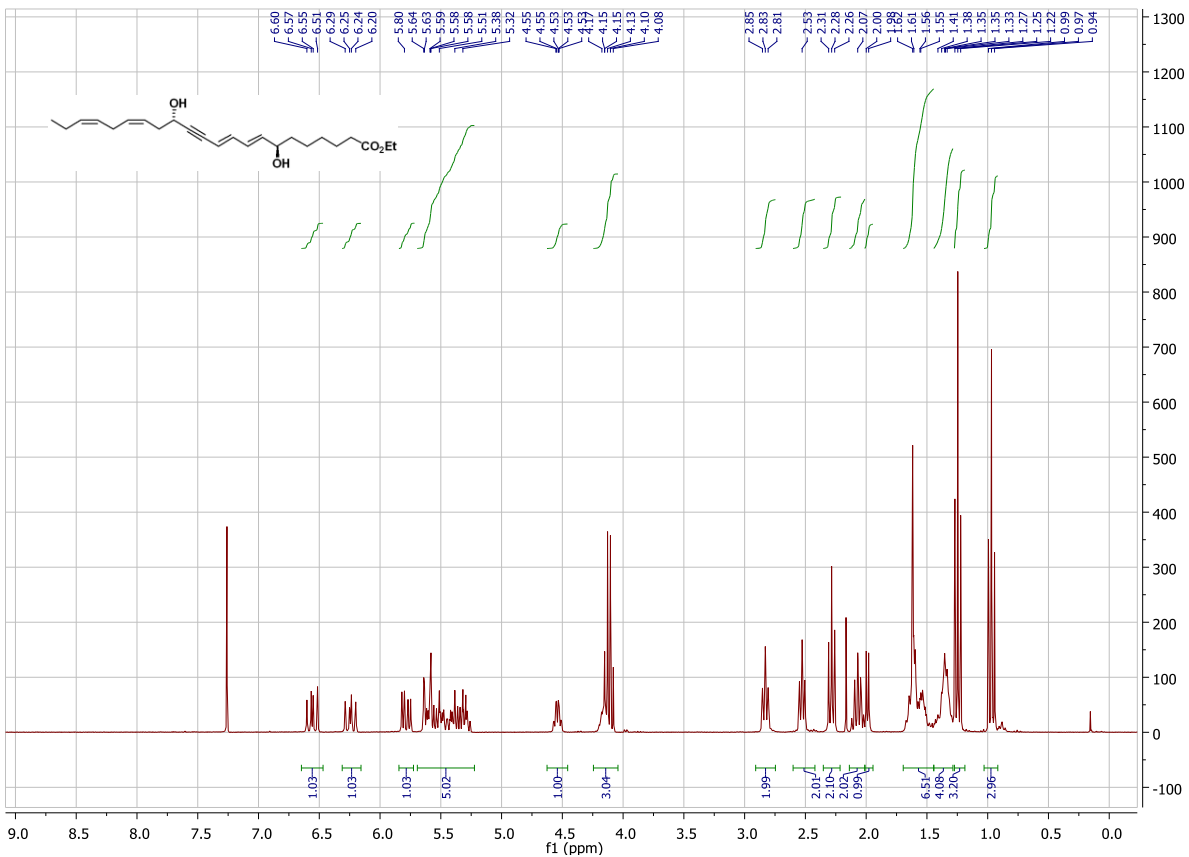

Figure S-13 <sup>1</sup>H-NMR spectrum of compound 25.

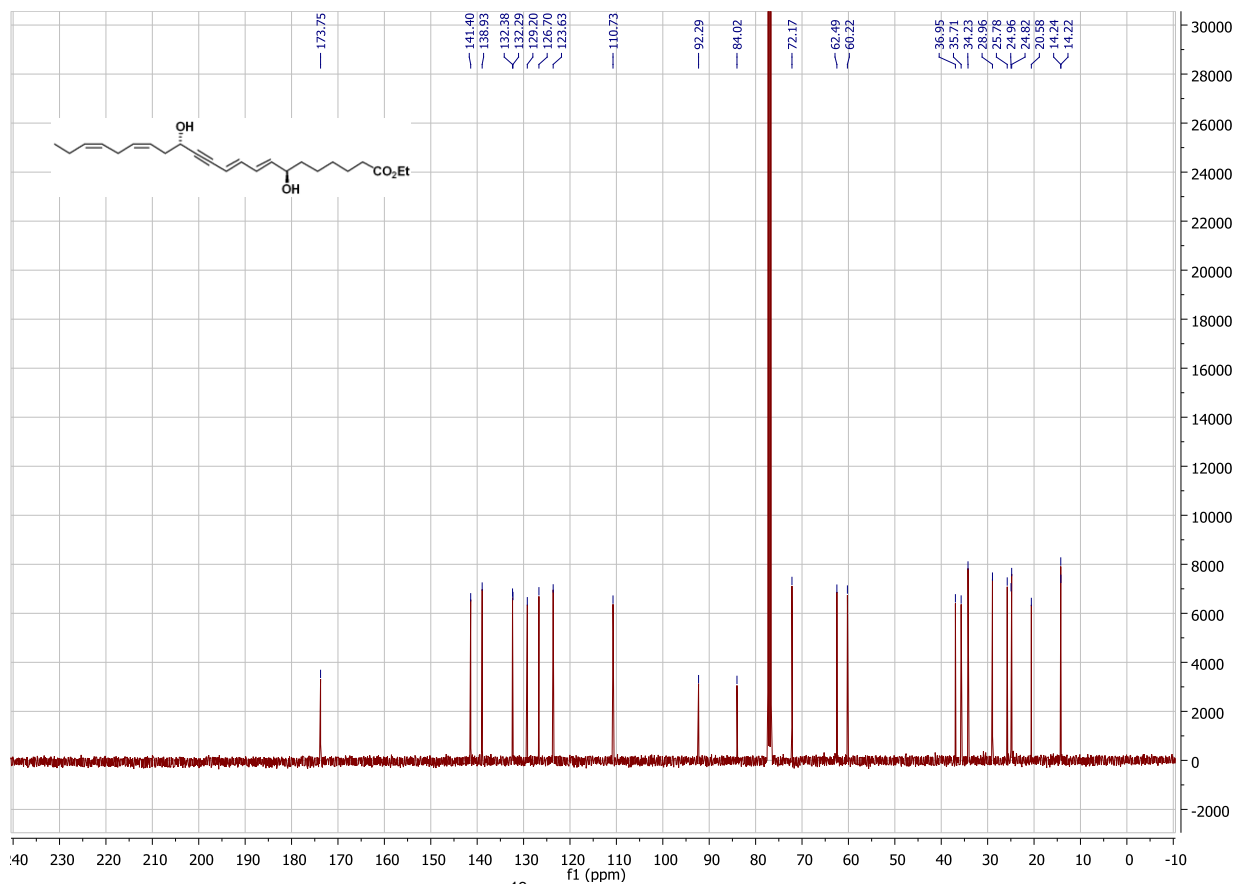

Figure S-14 <sup>13</sup>C-NMR spectrum of compound 25.

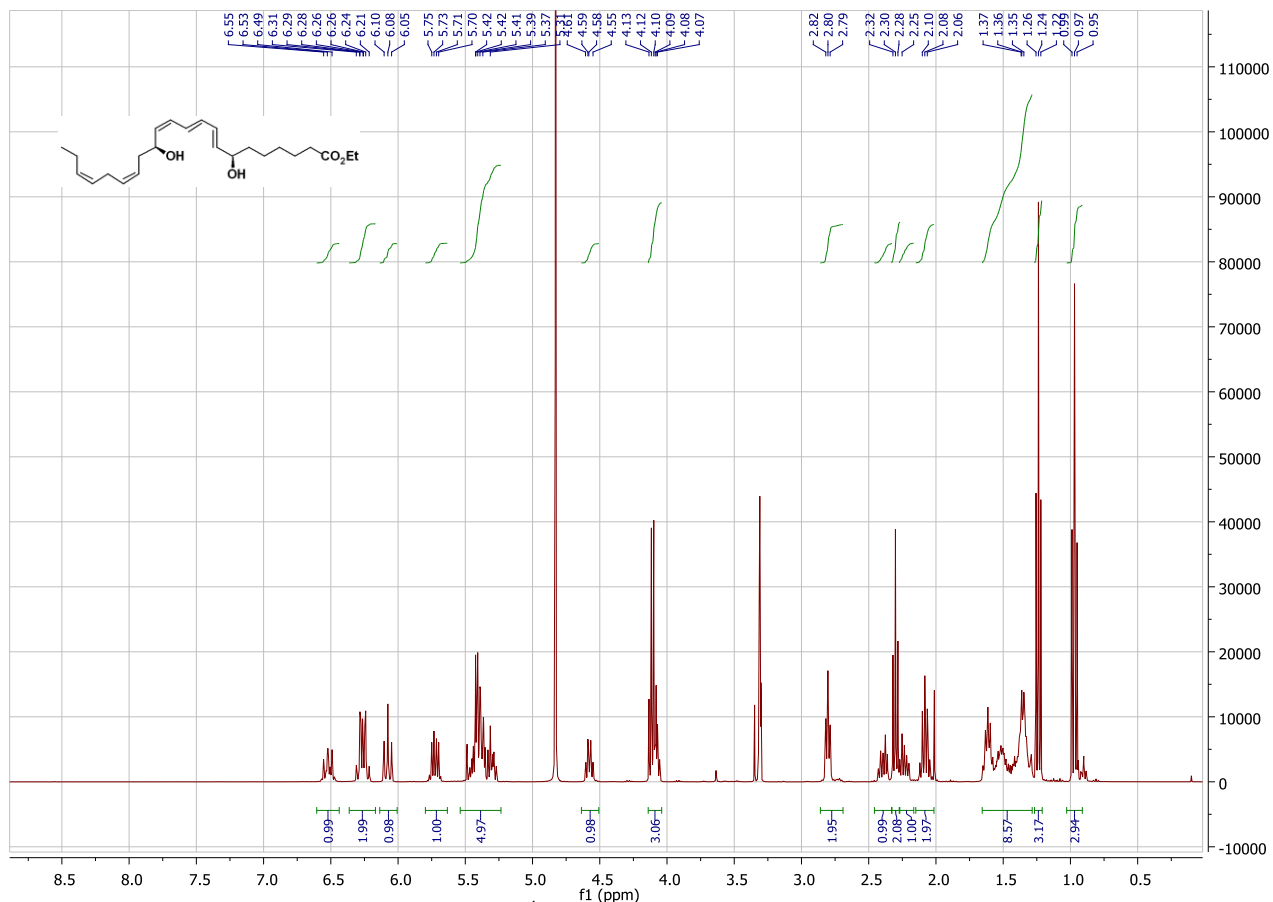

Figure S-15 <sup>1</sup>H-NMR spectrum of ethyl ester 26.

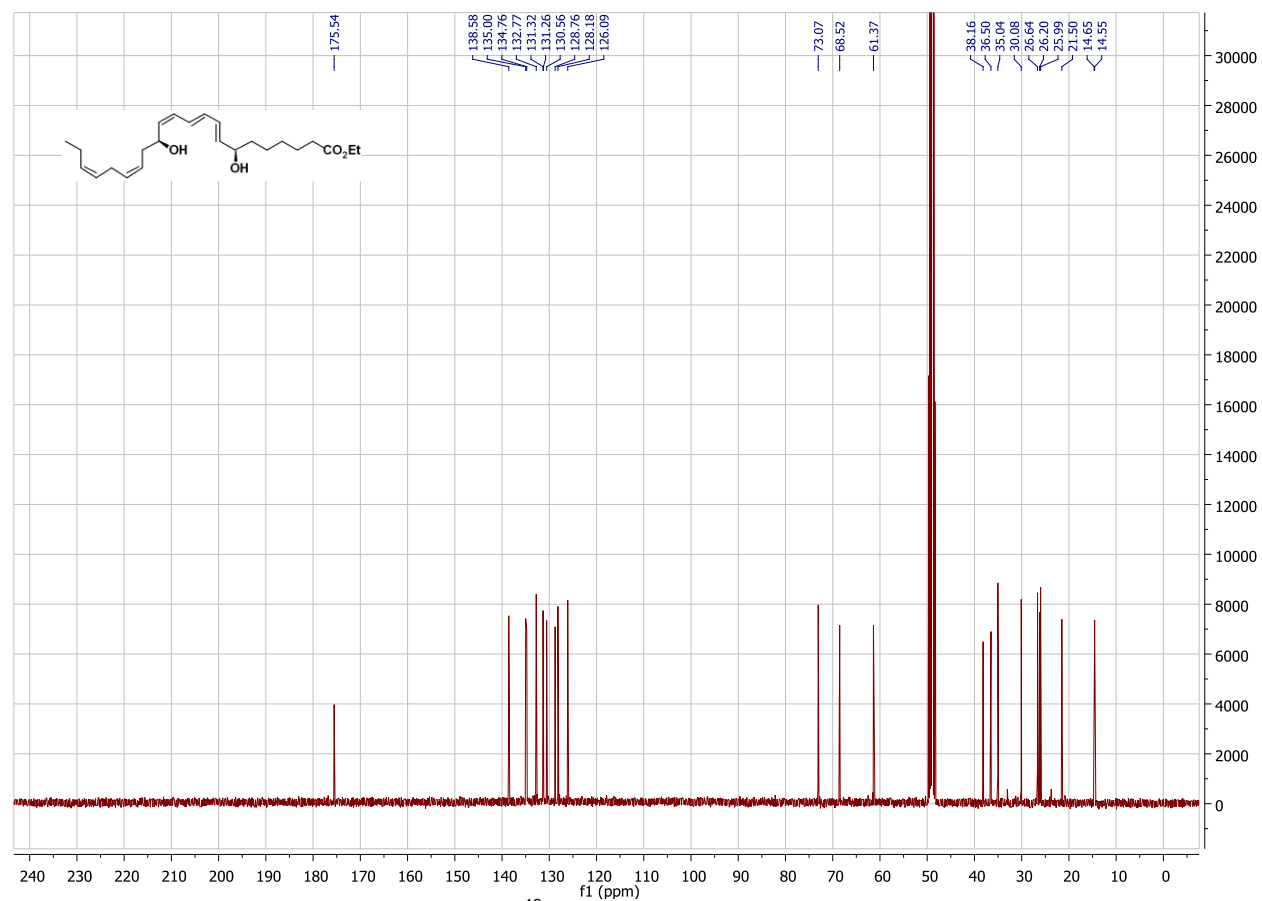

Figure S-16 <sup>13</sup>C-NMR spectrum of ethyl ester 26.

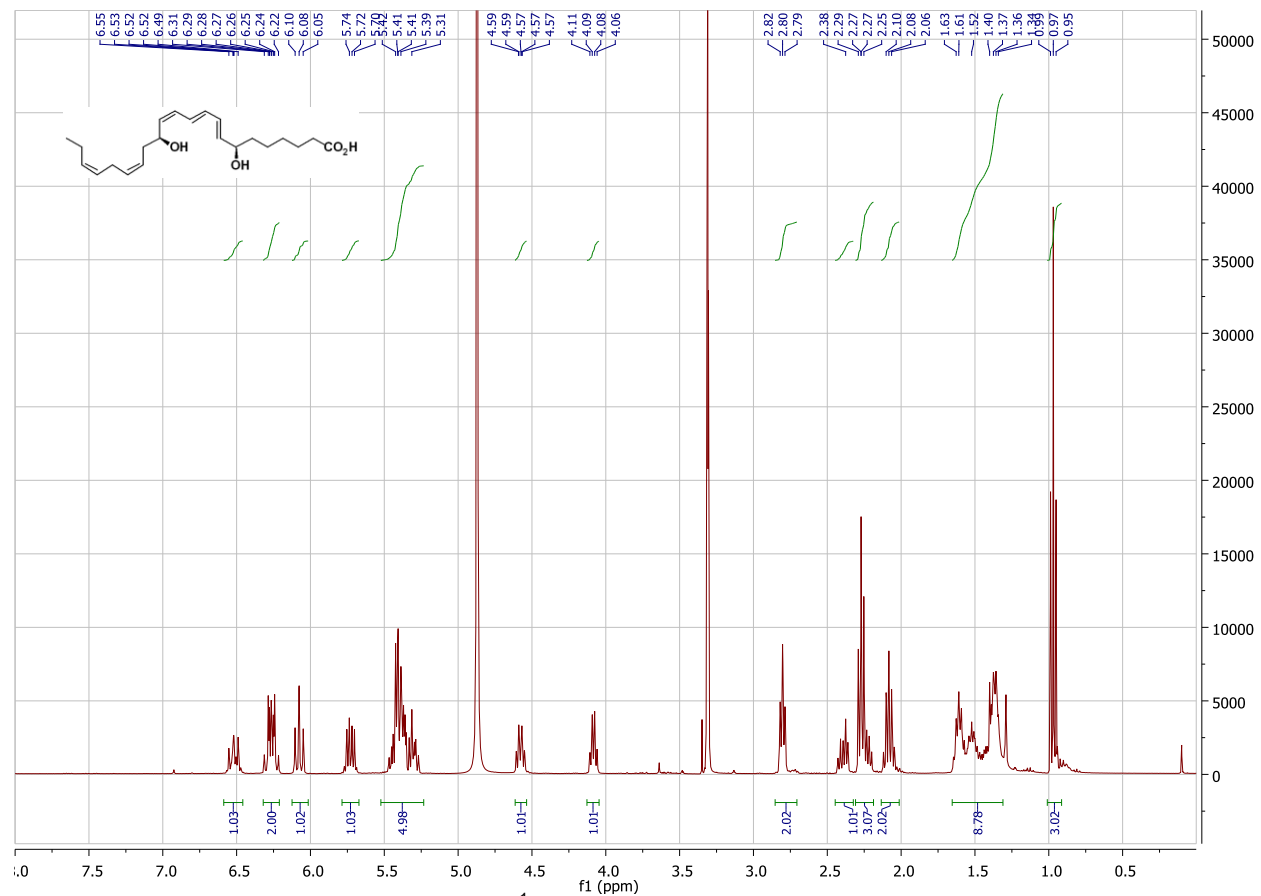

Figure S-17 <sup>1</sup>H-NMR spectrum of MaR1<sub>n-3</sub> DPA (5).

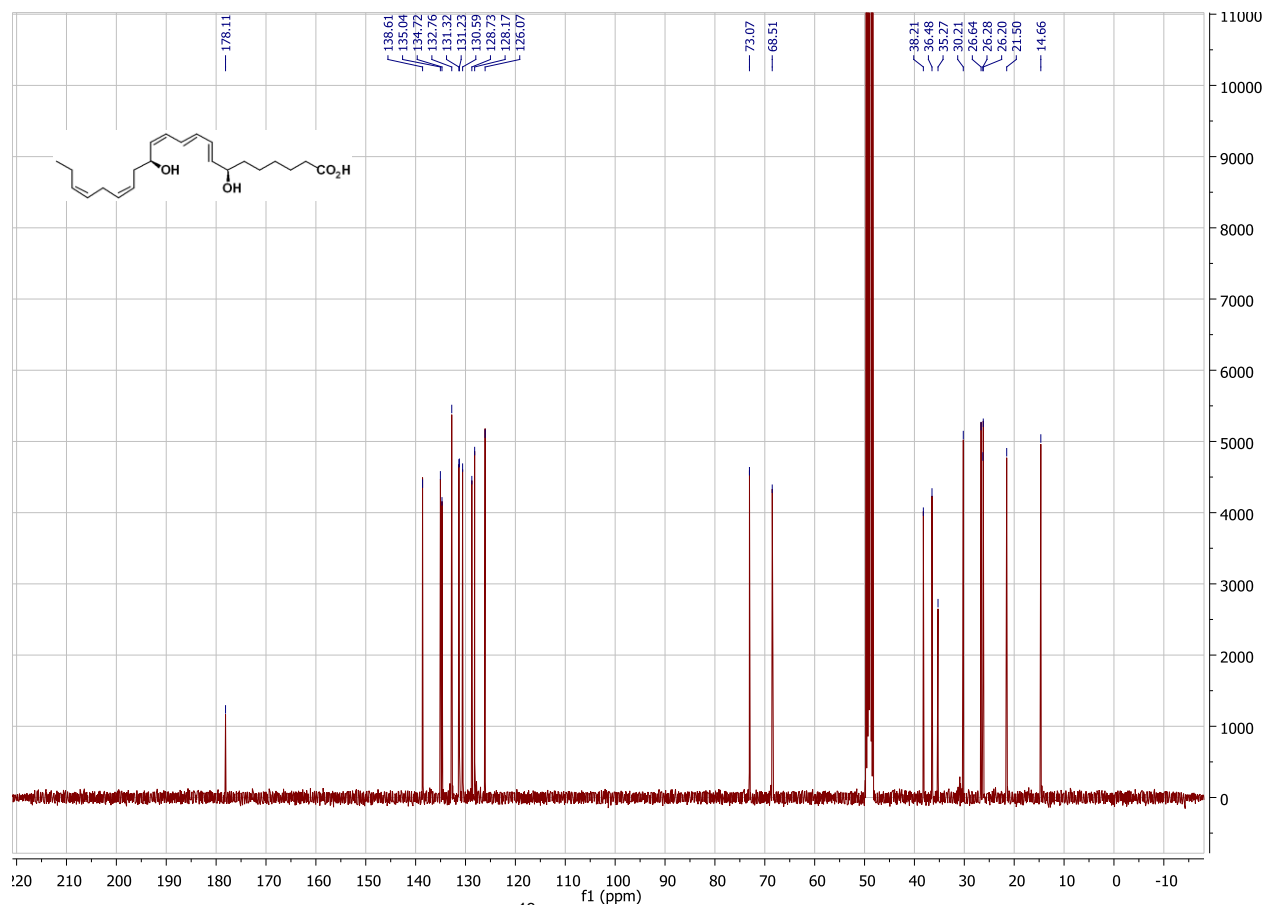

Figure S-18 <sup>13</sup>C-NMR spectrum of MaR1<sub>n-3</sub> DPA (5).

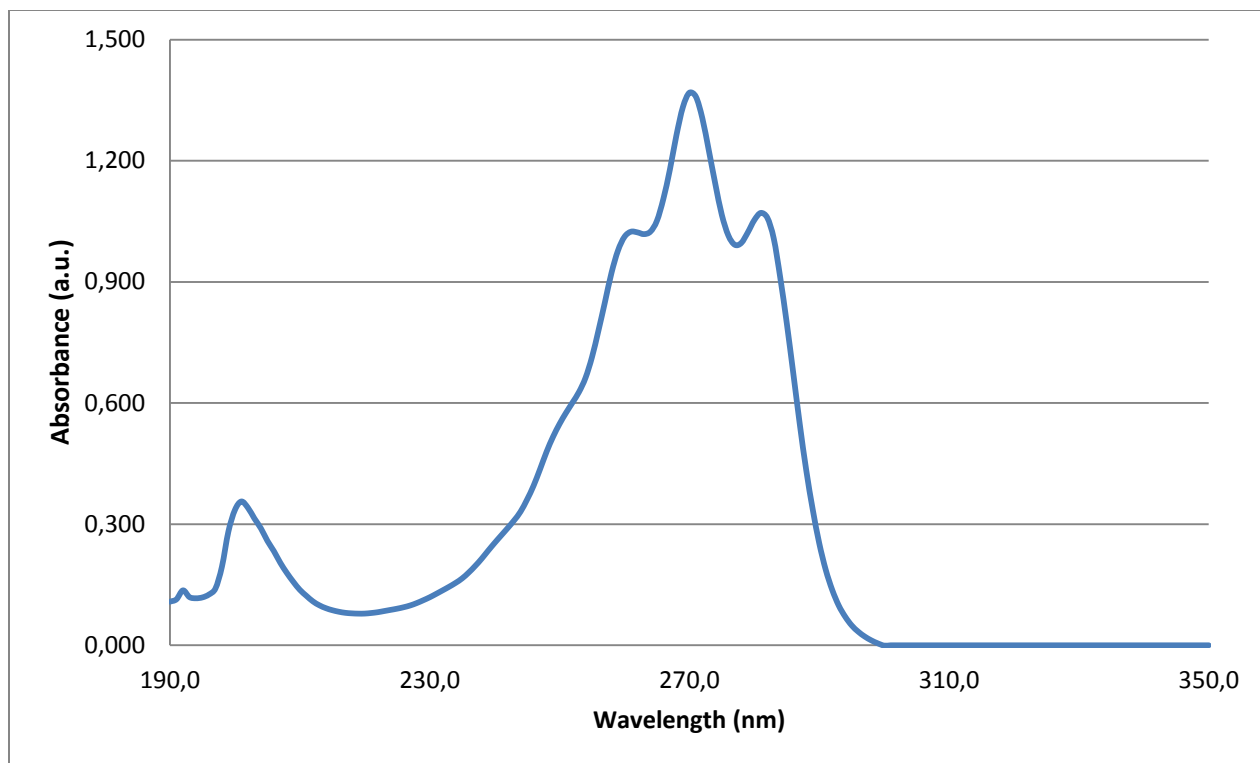

Figure S-19 UV-Vis chromatogram of ethyl ester 26.

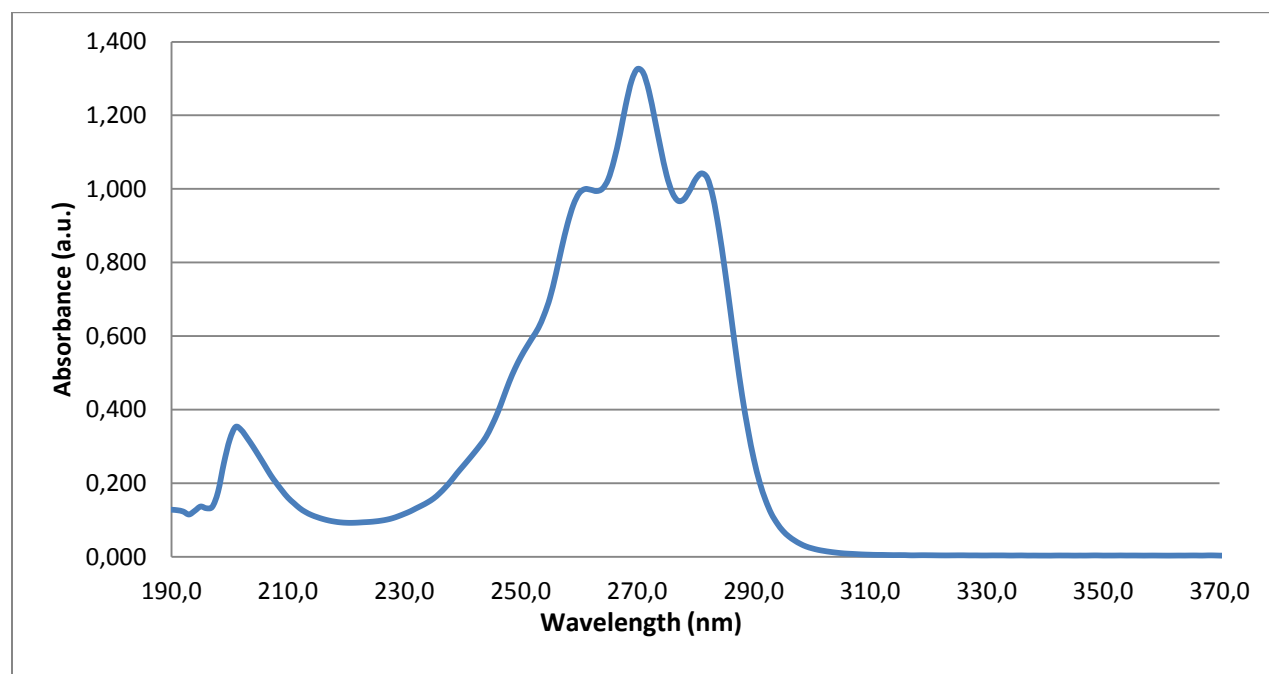

Figure S-20 UV-Vis chromatogram of MaR1<sub>n-3</sub>DPA (5).



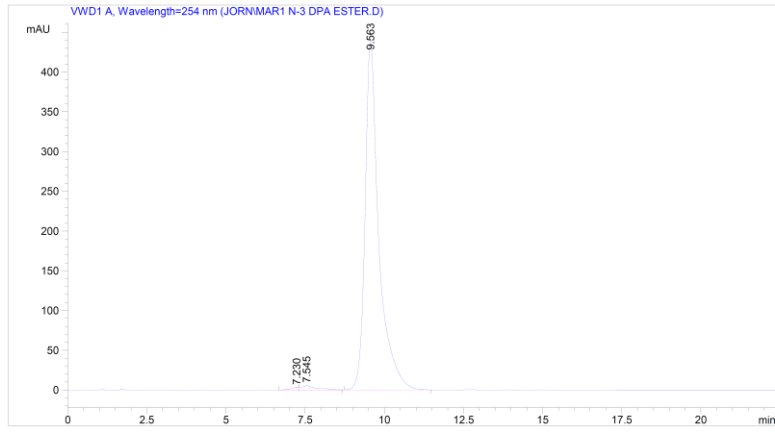

=====  
 Area Percent Report  
 =====

Sorted By : Signal  
 Multiplier : 1.0000  
 Dilution : 1.0000  
 Sample Amount : 1.00000 [ng/ul] (not used in calc.)  
 Use Multiplier & Dilution Factor with ISTDs

Signal 1: VWD1 A, Wavelength=254 nm

| Peak # | RetTime [min] | Type | Width [min] | Area mAU *s | Height [mAU] | Area %  |
|--------|---------------|------|-------------|-------------|--------------|---------|
| 1      | 7.230         | BV   | 0.2577      | 51.84959    | 2.96812      | 0.3843  |
| 2      | 7.545         | VB   | 0.4849      | 189.92511   | 5.37709      | 1.4076  |
| 3      | 9.563         | BB   | 0.4348      | 1.32514e4   | 439.50296    | 98.2082 |

Totals : 1.34932e4 447.84816

=====  
 \*\*\* End of Report \*\*\*

Figure S-21 HPLC chromatogram of ethyl ester 26.

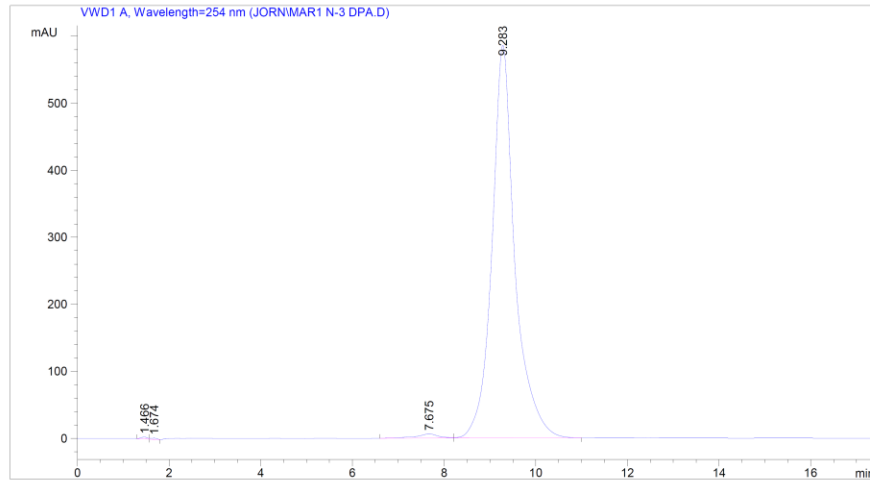

=====  
 Area Percent Report  
 =====

Sorted By : Signal  
 Multiplier : 1.0000  
 Dilution : 1.0000  
 Sample Amount : 1.00000 [ng/ul] (not used in calc.)  
 Use Multiplier & Dilution Factor with ISTDs

Signal 1: VWD1 A, Wavelength=254 nm

| Peak # | RetTime [min] | Type | Width [min] | Area mAU *s | Height [mAU] | Area %  |
|--------|---------------|------|-------------|-------------|--------------|---------|
| 1      | 1.466         | BV   | 0.1512      | 27.86030    | 2.94407      | 0.1350  |
| 2      | 1.674         | VV   | 0.1485      | 18.57285    | 1.81574      | 0.0900  |
| 3      | 7.675         | BV   | 0.4743      | 219.81453   | 6.48084      | 1.0650  |
| 4      | 9.283         | VB   | 0.4987      | 2.03737e4   | 586.10352    | 98.7100 |

Totals : 2.06399e4 597.34417

=====  
 \*\*\* End of Report \*\*\*

Figure S-22 HPLC chromatogram of MaR1<sub>n-3</sub>DPA (5)

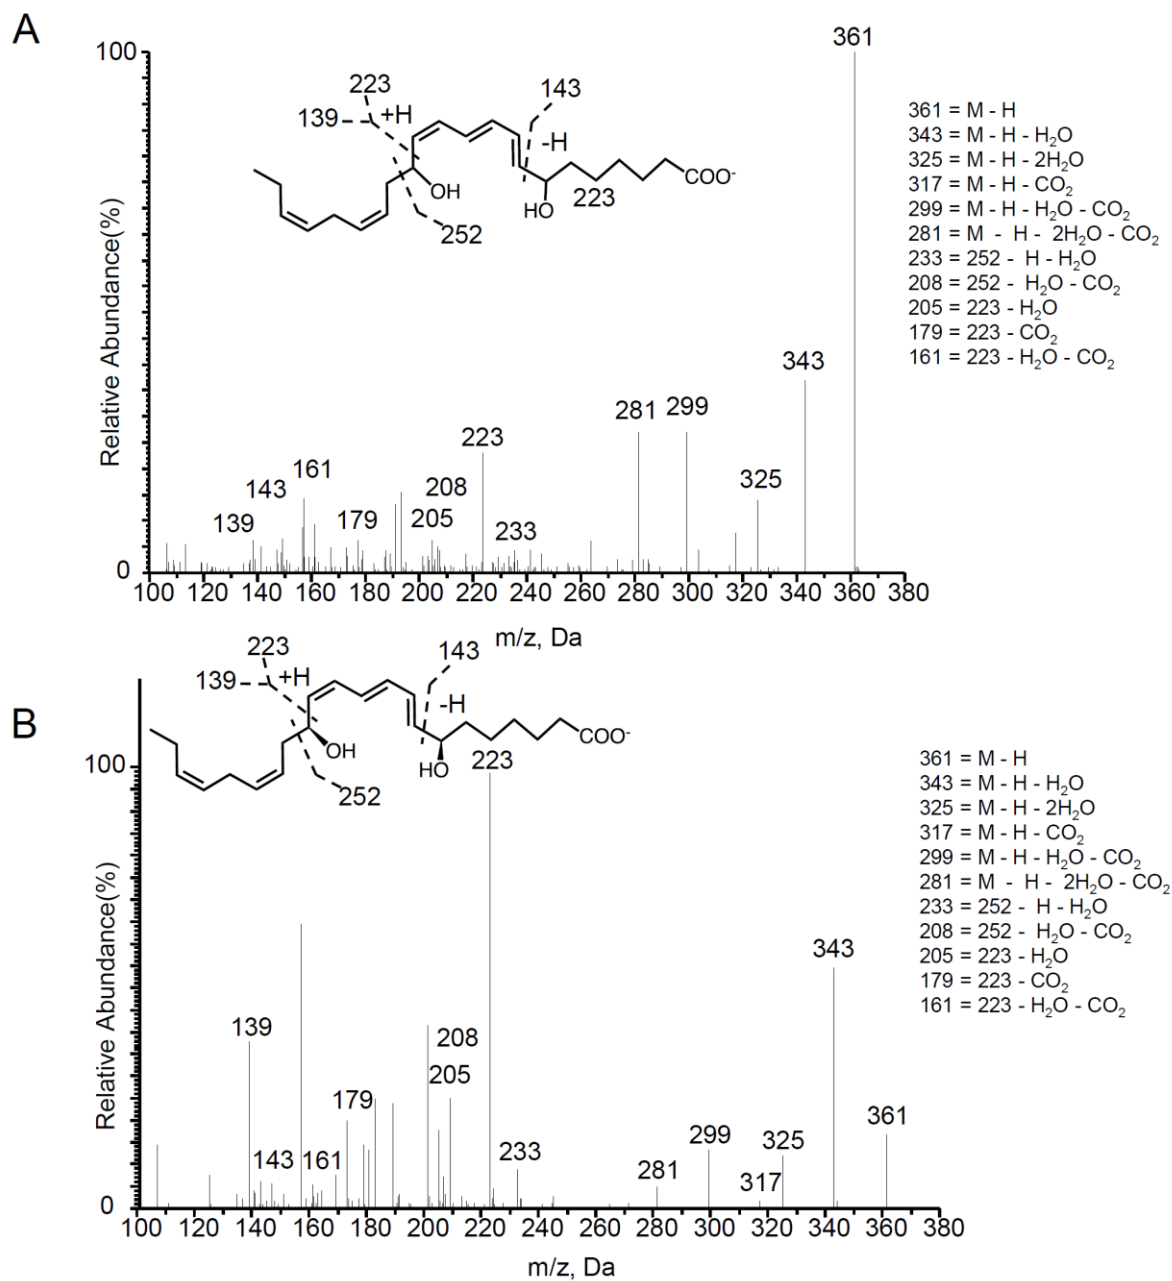

**Figure S-23: Matching MS-MS spectra for human macrophage MaR1<sub>n-3</sub> DPA and synthetic material.** Representative MS-MS spectra. A) human macrophage MaR1<sub>n-3</sub> DPA . MS-MS spectrum for peak at T<sub>R</sub> = ~14.1 min). n = 3 human macrophage preparations. B) MS-MS spectrum of synthetic material (T<sub>R</sub> = ~14.1 min). d = 4.

## References

1. Wernerova, M.; Hudlicky, T. *Synlett* **2010**, 18, 2701
2. Becher, B. *Org. Synth.* **1980**, 59, 79
3. Soullez, D; Ple, G; Duhamel, L; Duhamel, P. *J. Chem. Soc.* **1997**, 11, 1639
4. Romero-Ortega, M; Colby, D. A; Olivo, H. F. *Tetrahedron Lett.* **2002**, 43, 6439
5. E. J. Corey, H. Cho, C. Rucker, D. H. Hua. *Tetrahedron Lett.* **1981**, 22, 3455
6. Tello-Aburto, R; Ochoa-Teran, A; Olivo, H. F. *Tetrahedron. Lett.* **2006**, 47, 5915
7. Detterbeck, R.; Guggisberg, A.; Popaj, K.; Hesse, M. *Helv. Chim. Acta*, **2002**, 85, 1742
8. Kojima, K.; Koyama, K.; Amemiya, S. *Tetrahedron* **1985**, 41, 4449
9. Corey, E. J.; Cho, H.; Rucker, C.; Hua, D. H. *Tetrahedron Lett.* **1981**, 22, 3455.
10. Schinzer, D.; Bauer, A.; Schieber, J. *Chem. Eur. J.* **1999**, 5, 2492
11. Takano, S.; Sugihara, T.; Ogasawara, K. *Tetrahedron Lett.* **1991**, 32, 2797.
12. Smith, A. B. III; Ott, G. R. *J. Am. Chem. Soc.* **1998**, 120, 3935
